# Supplementary material for: Mitotic chromosome binding predicts transcription factor properties in interphase
Source: PubMed Central journal article supplement (PMC6353955; doi:10.1038/s41467-019-08417-5), 2019-01-30
Supplement: 41467_2019_8417_MOESM1_ESM.pdf [file 41467_2019_8417_MOESM1_ESM.pdf]

Mitotic chromosome binding predicts transcription factor properties in interphase

Raccaud et al.

**Supplementary Information**

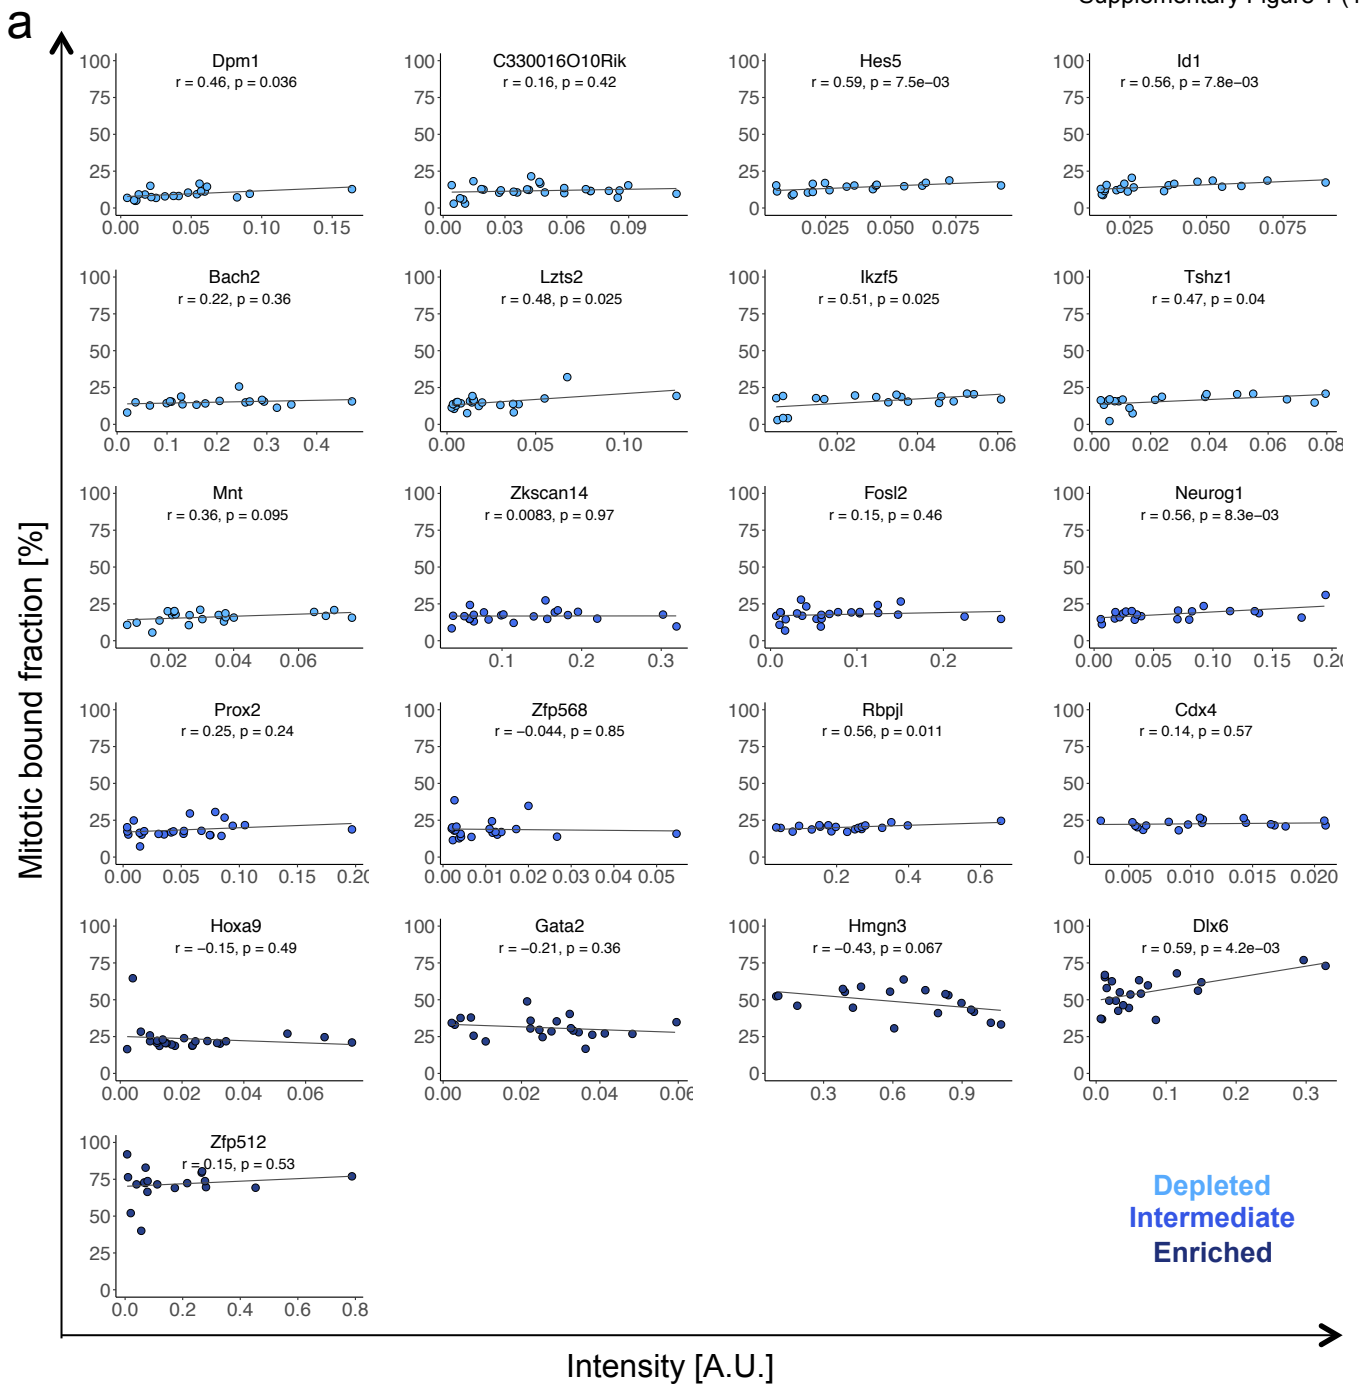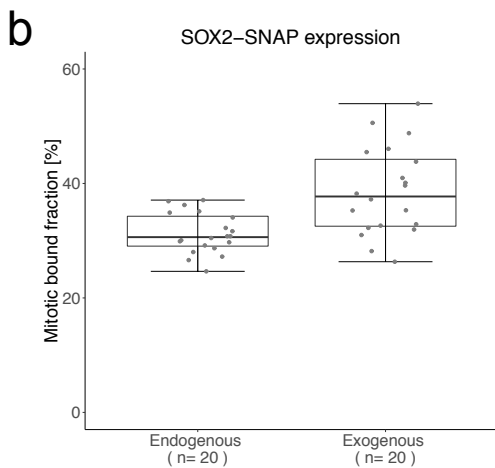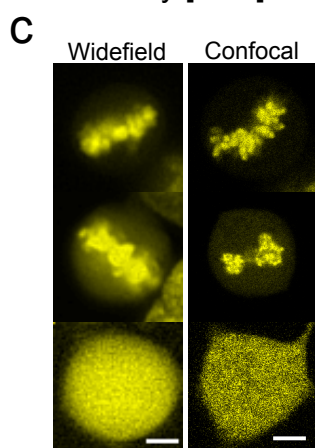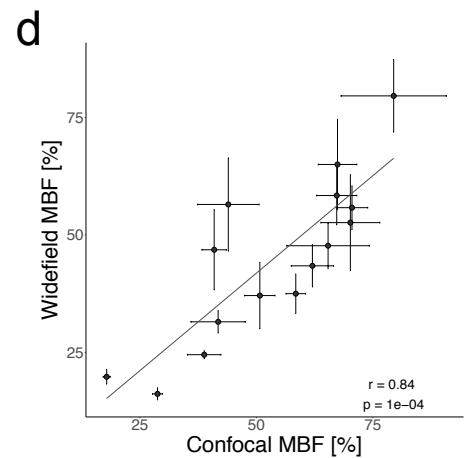

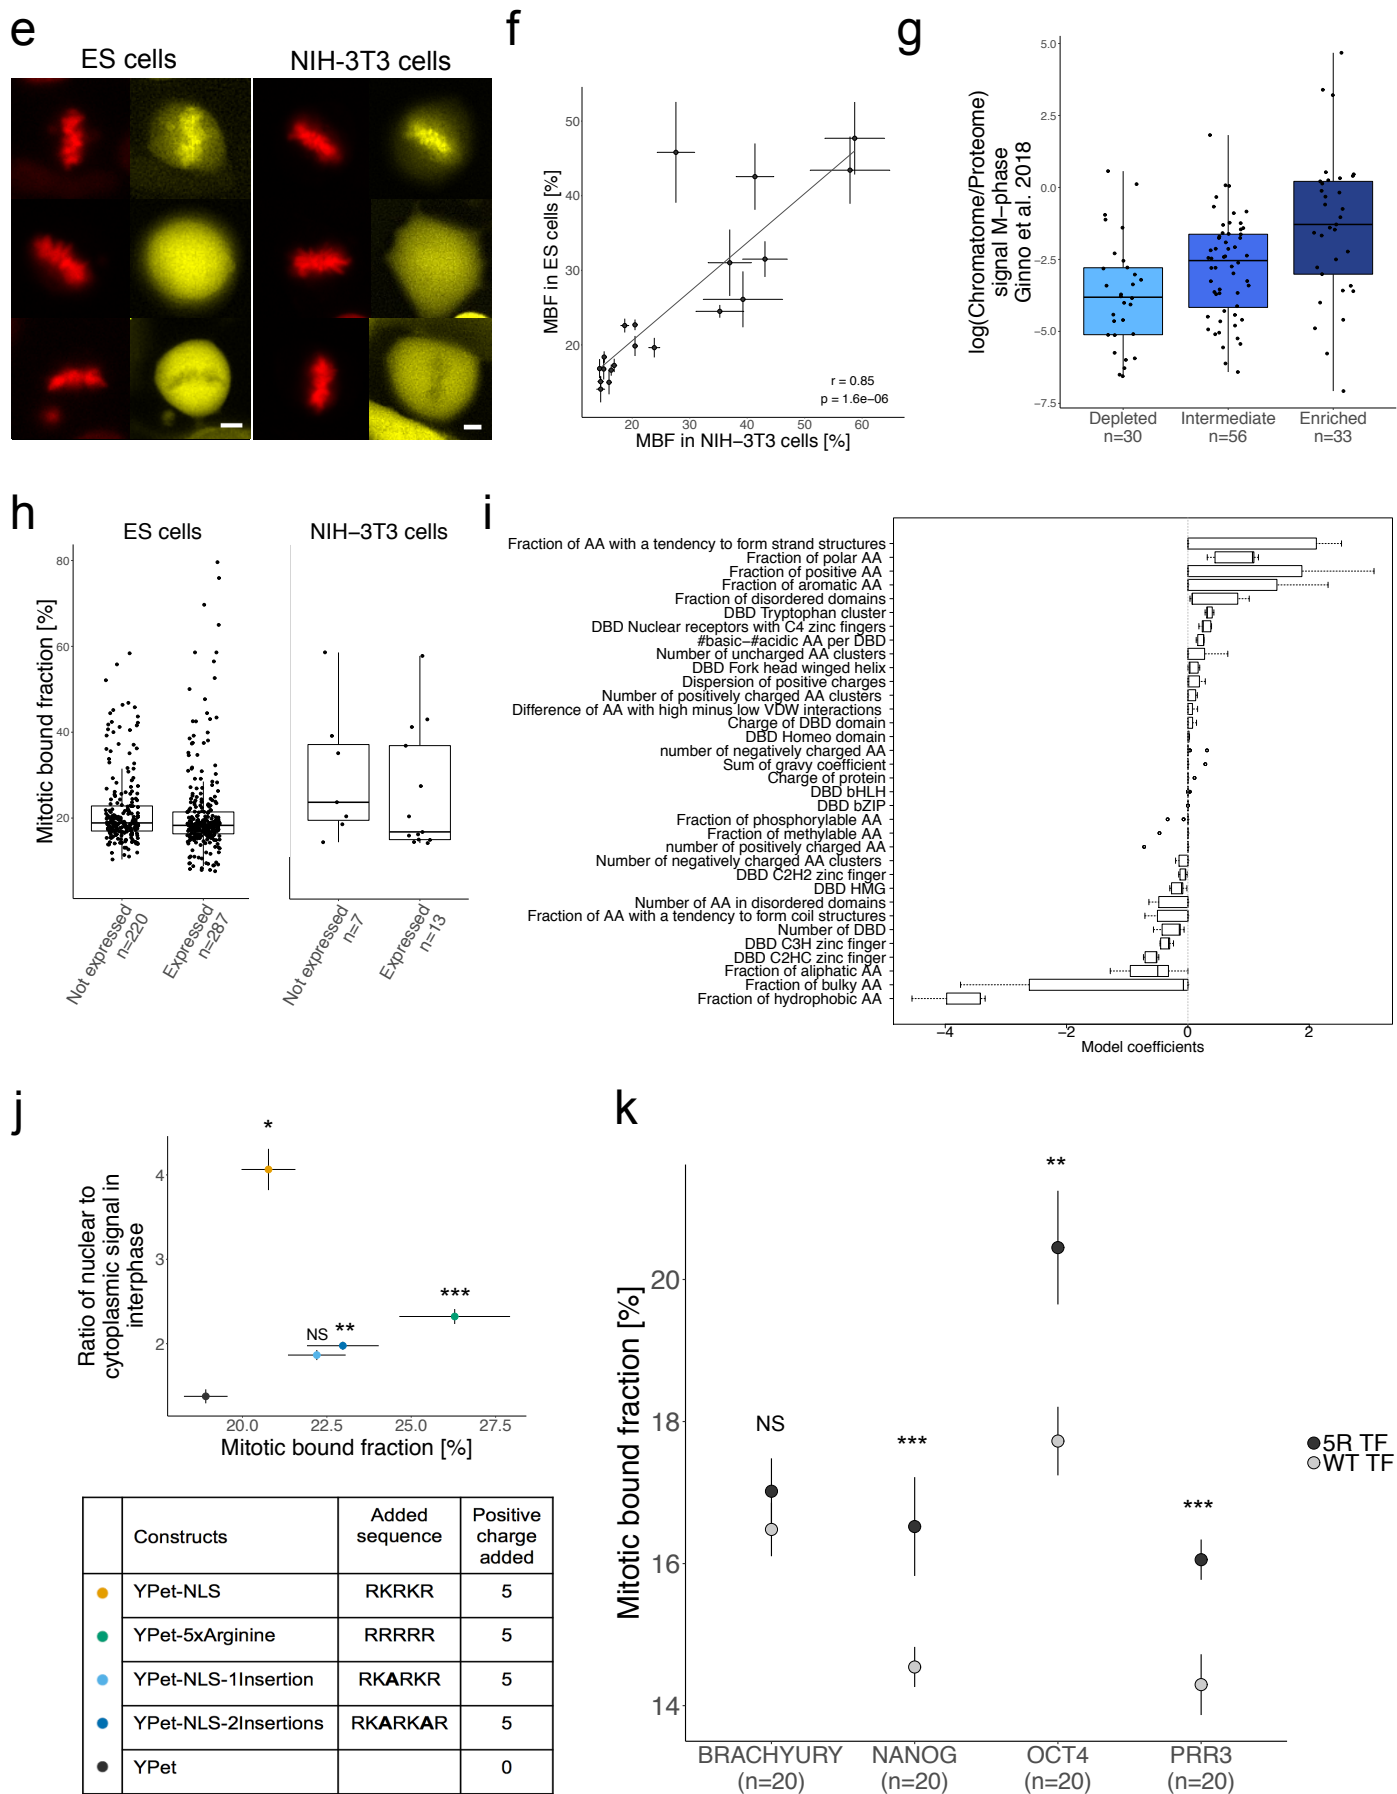

**Supplementary Figure 1. Examples of MBF measurements by confocal microscopy in ES cells, MBF measurements in NIH-3T3 cells, additional parameters impacting the MBF, and impact of positively charged amino acids on the MBF. Related to Fig. 1.**

**a:** Correlations between TF expression and mitotic bound fraction for all TFs with at least 19 cells quantified, sorted from lower to higher mitotic bound fraction.

**b:** Comparison of mitotic bound fractions for endogenous or exogenous (overexpression) of SOX2-SNAP.

**c:** Examples of TF-YPet localization in metaphase cells imaged with wide-field or confocal microscopy. Scale bar: 5 $\mu$ M.

**d:** Correlation between the mitotic bound fractions measured by wide-field or confocal microscopy (n=10). Error bars: SEM.

**e:** Examples of TF-YPet localization in metaphase cells imaged in ES cells and NIH-3T3 cells. Scale bar: 5 $\mu$ M.

**f:** Correlation between the mitotic bound fractions measured in ES cells and NIH-3T3 cells (for n values see Supplementary Table 3). Error bars: SEM.

**g:** Log ratio of Chromatome over Proteome signal of TFs in M-phase cells from Ginno et al. 2018 in the Depleted, Intermediate, and Enriched bins from this study.

**h:** MBFs of TFs expressed endogenously or not in ES cells and NIH-3T3 cells.

**i:** Quantification of the impact of all machine learning parameters that were correlated with the mitotic bound fraction and retained at least once by the algorithm (n=500 runs).

**j:** Impact of the NLS sequence or positively charged amino acids on the co-localization of YPet with mitotic chromosomes. (n>10) Error bars: SEM. \* p < 0.05; \*\* p < 0.01; \*\*\* p < 0.001; NS. not significant. P-values were obtained using a Wilcoxon rank-sum test.

**k:** Comparison of mitotic bound fraction of wildtype TFs (WT) or N-terminally tagged with five arginine residues (5R). Error bars: SEM. \*\* p < 0.01; \*\*\* p < 0.001; NS. not significant.

Boxplots: Boxes: intervals between the 25th and 75th percentile and median (horizontal line). Error bars: 1.5-fold the interquartile range or the closest data point when no data point is outside this range. P-values were obtained using a Wilcoxon rank-sum test.

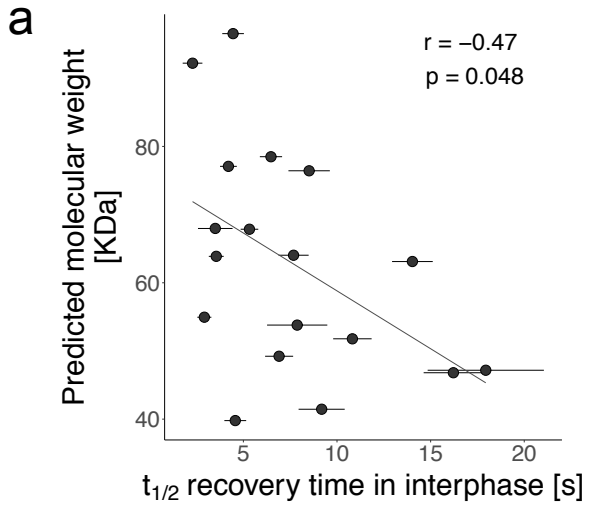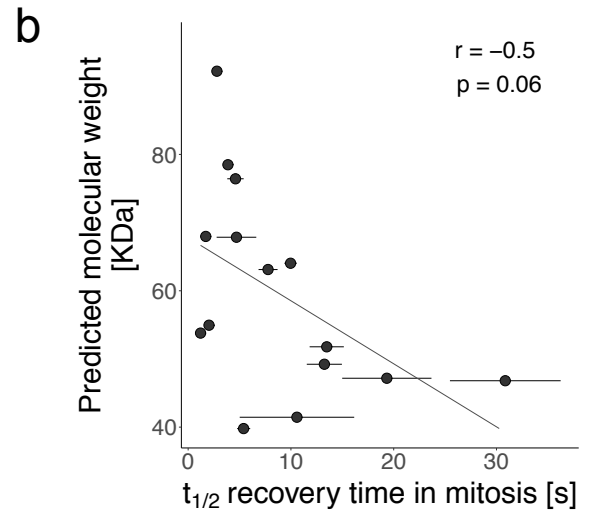

**Supplementary Figure 2: Correlation of TF mobility with TF size. Related to Fig. 3.**

**a:** Correlation between FRAP  $t_{1/2}$  recovery in interphase and the predicted molecular weight of transcription factors.

**b:** Correlation between FRAP  $t_{1/2}$  recovery in mitosis and the predicted molecular weight of transcription factors.

Error bars: SEM (n=10).

a

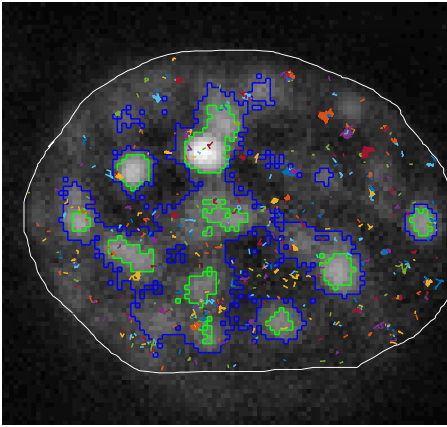

b

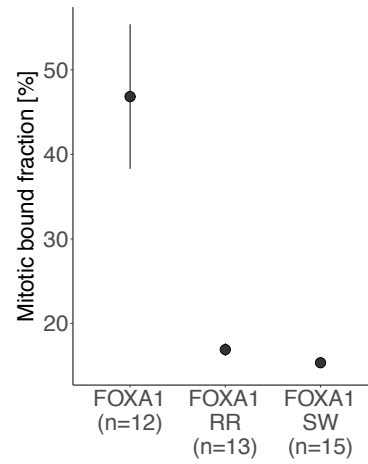

c

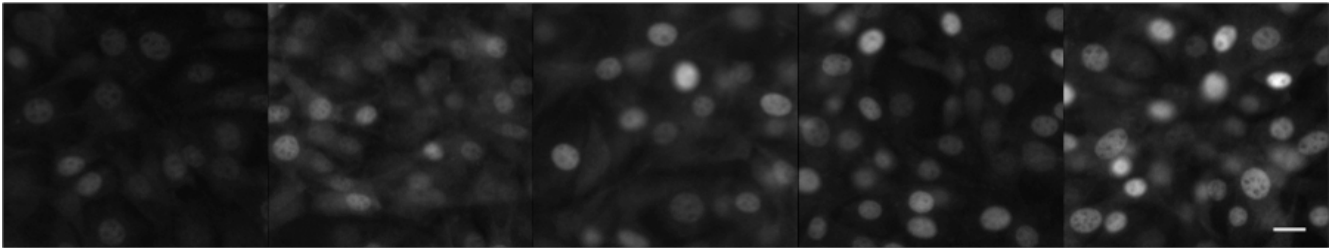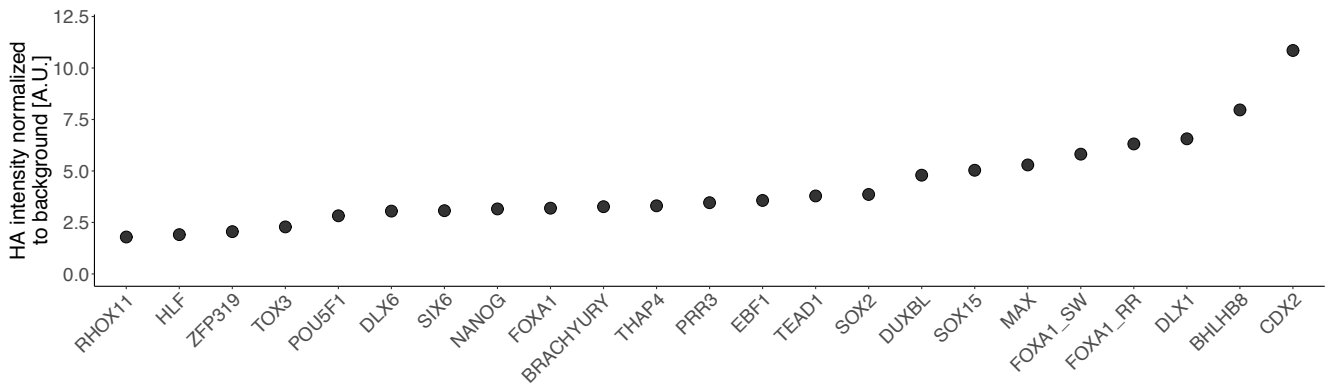

d

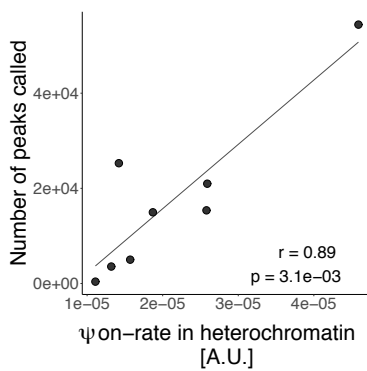

e

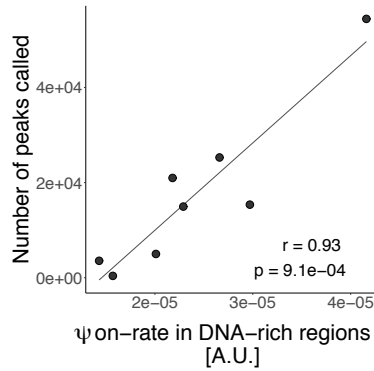

f

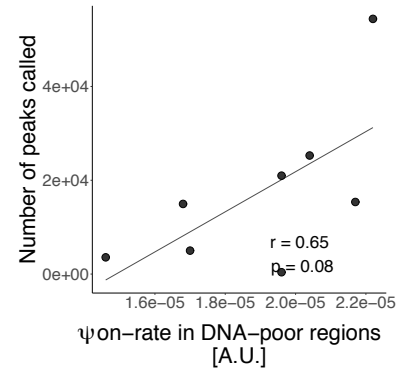

**Supplementary Figure 3: Single molecule imaging of TF-DNA interactions. Related to Fig. 4.**

**a:** Representative image of single molecule imaging of TFs. Regions displaying different densities of DNA that we automatically detected are shown in green (heterochromatin) and blue (DNA-dense). Tracks of single molecule events are displayed as in all other colors.

**b:** Mitotic bound fraction of FOXA1, FOXA1<sub>RR</sub> and FOXA1<sub>SW</sub> mutants. Error bars: SEM.

**c:** Selected images of immunofluorescence staining (anti-HA.11 IgG, BioLegend, # 901501, 1:500) of the HA-tagged TFs in selected dox-inducible cell lines (top) and HA signal quantification for all TF-3xHAs (bottom). Scale bar: 20 $\mu$ m.

**d-f:** Correlation between the  $\psi$ on-rate in heterochromatic (**d**), DNA-rich (**e**) and DNA-poor (**f**) regions and the number of ChIP-seq peaks called.



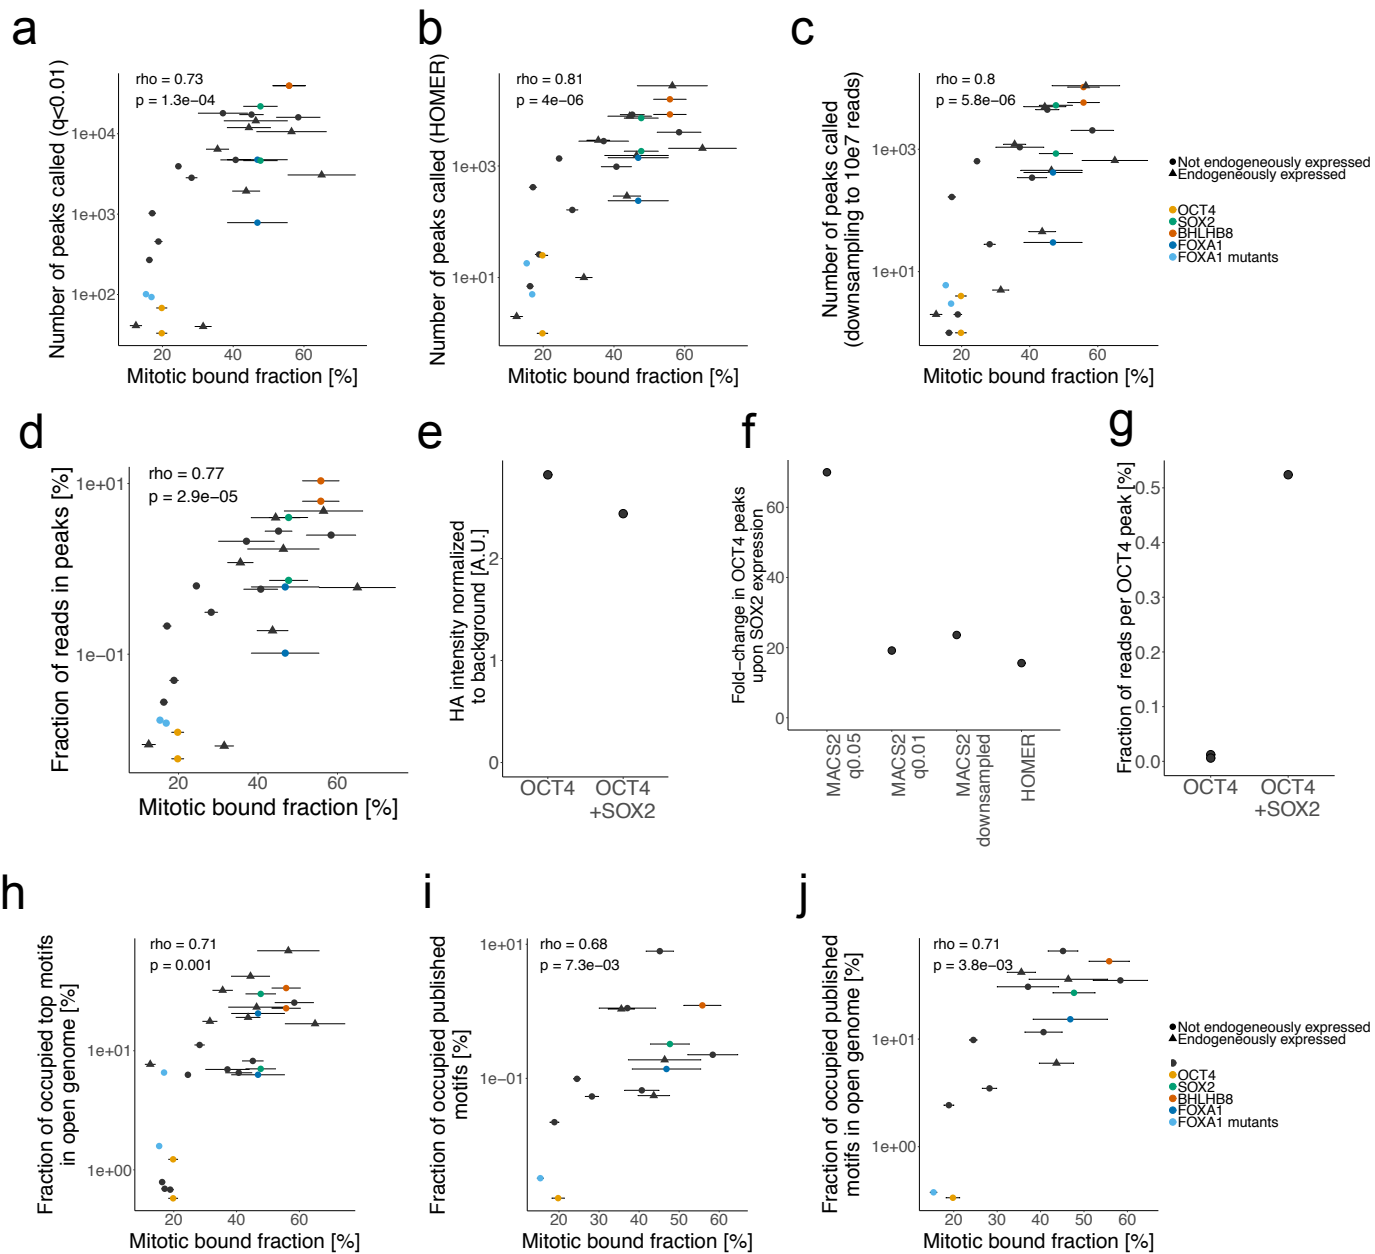

**Supplementary Figure 4: Mitotic chromosome binding predicts genome-wide TF occupancy. Related to Fig. 4.**

**a:** Correlation between the mitotic bound fraction and the number of ChIP-seq peaks called with MACS2 using a q-value cutoff of 0.01. Duplicates are indicated for OCT4 (yellow), SOX2 (green), BHLHB8 (red), and FOXA1 (dark blue). The two FOXA1 mutants are shown in light blue. Triangles: TFs endogenously expressed in NIH-3T3. Circles: TFs not endogenously expressed in NIH-3T3.

**b:** Correlation between the mitotic bound fraction and the number of ChIP-seq peaks called with HOMER. Same color- and shape-coding as Supplementary Fig. 4a.

**c:** Correlation between the mitotic bound fraction and the number of ChIP-seq peaks called with MACS2 using a downsampling to 10 million reads per samples. Same color- and shape-coding as Supplementary Fig. 4a.

**d:** Correlation between the mitotic bound fraction and the fraction of ChIP-seq reads in peaks (MACS2  $q < 0.05$ ). Same color- and shape-coding as Supplementary Fig. 4a.

**e:** HA signal quantification for OCT4-3xHA in the presence of YPet-SOX2 in NIH-3T3 cells compared to OCT-3xHA alone.

**f:** Fold-change of the number of ChIP-seq peaks called for OCT4-3xHA in the presence of YPet-SOX2 compared to OCT-3xHA alone using different peak calling settings/algorithms.

**g:** Fraction of reads in peaks recovered for OCT4-3xHA in the presence of YPet-SOX2 in NIH-3T3 cells compared to OCT-3xHA alone (MACS2  $q < 0.05$ ).

**h:** Correlation between the mitotic bound fraction and the number of peaks overlapping with the most frequently found motif for each TF in accessible chromatin, normalized over the total number of motif occurrence in the genomic regions encompassing accessible chromatin. Same color- and shape-coding as Supplementary Fig. 4a.

**i:** Correlation between the mitotic bound fraction and the number of peaks overlapping with the published TF motif, normalized over the total number of motif occurrences in the genome. Same color- and shape-coding as Supplementary Fig. 4a.

**j:** Correlation between the mitotic bound fraction and the number of peaks in accessible chromatin overlapping with the published TF motif, normalized over the total number of motif occurrences in the accessible genome. Same color- and shape-coding as Supplementary Fig. 4a.

a

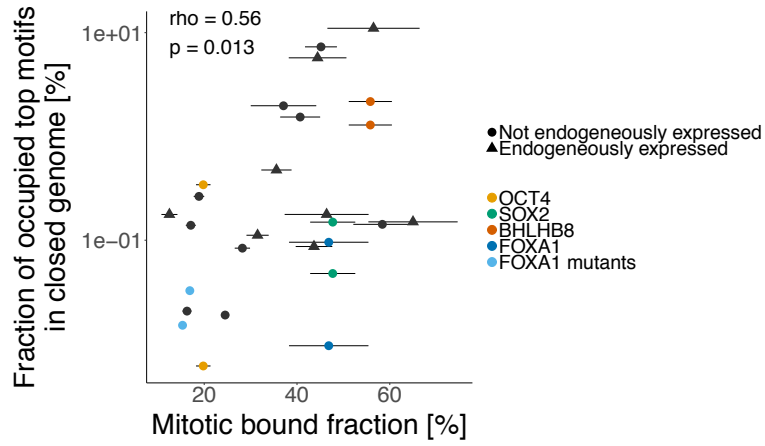

b

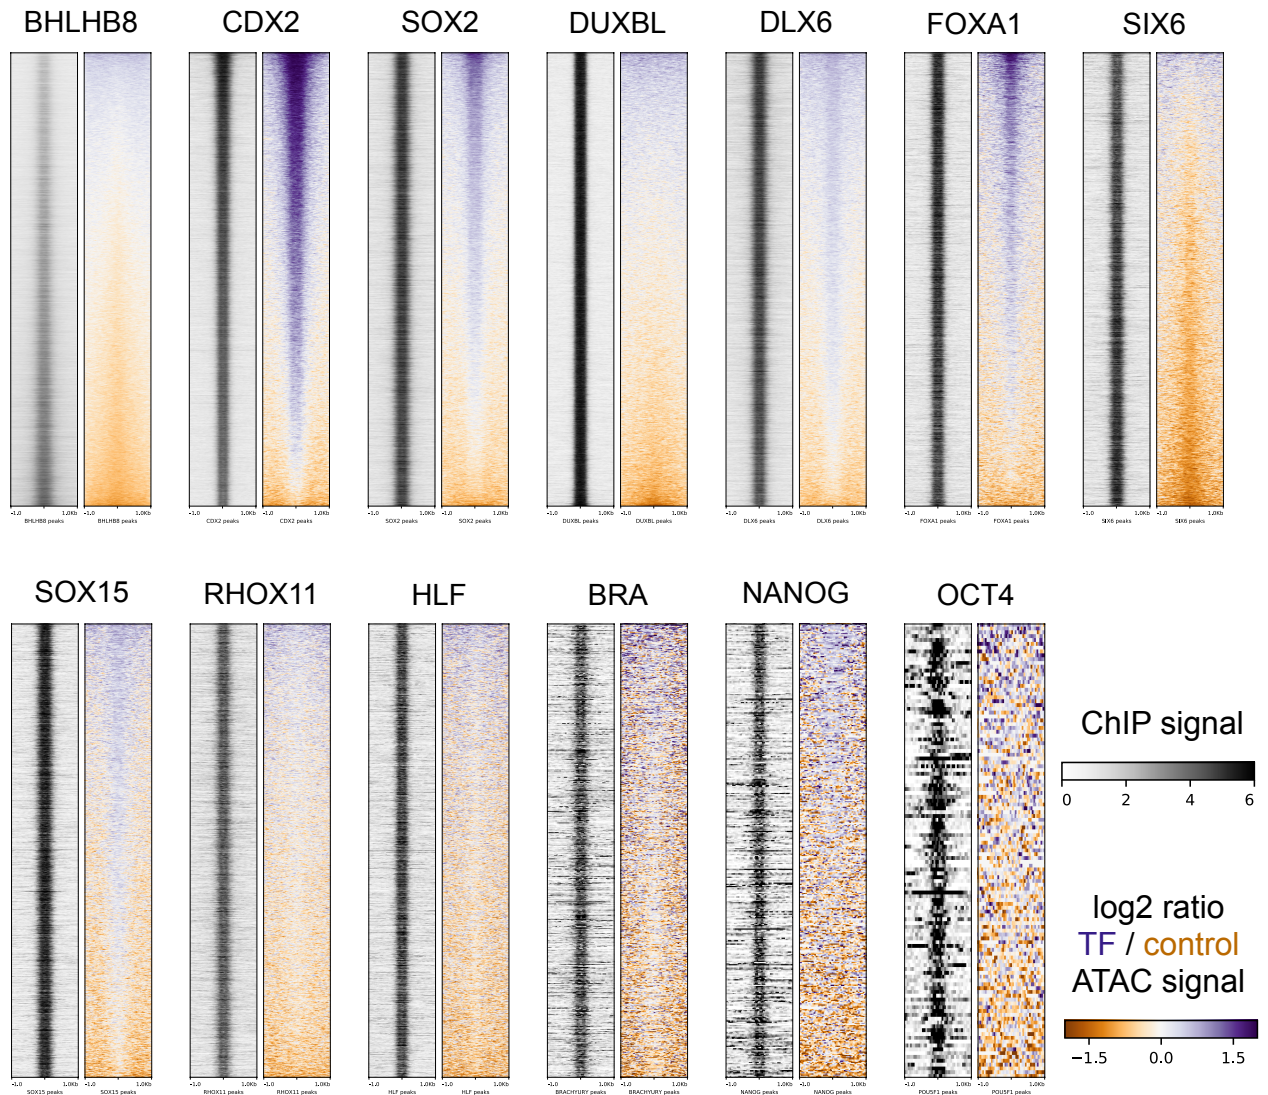

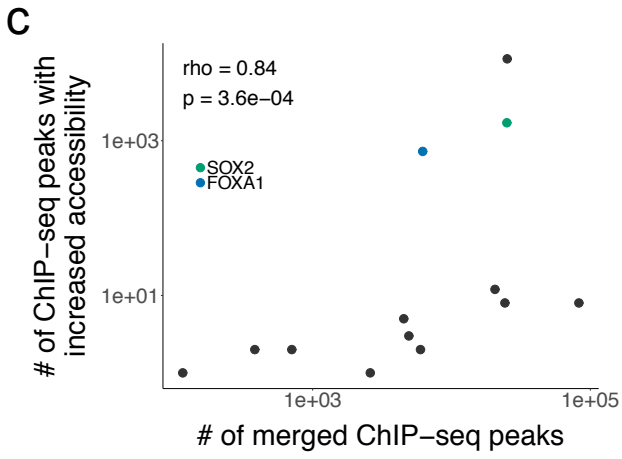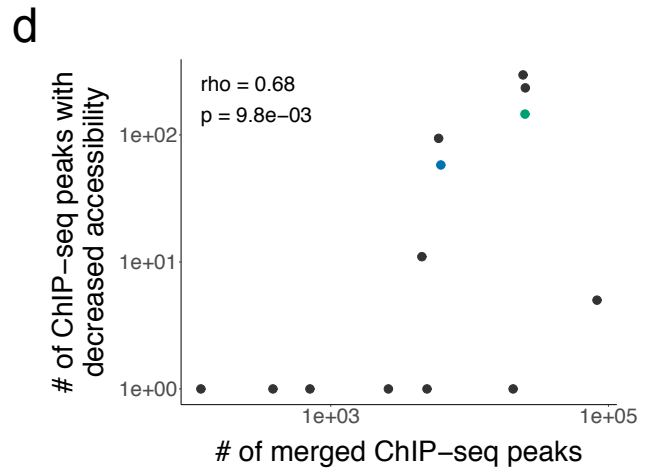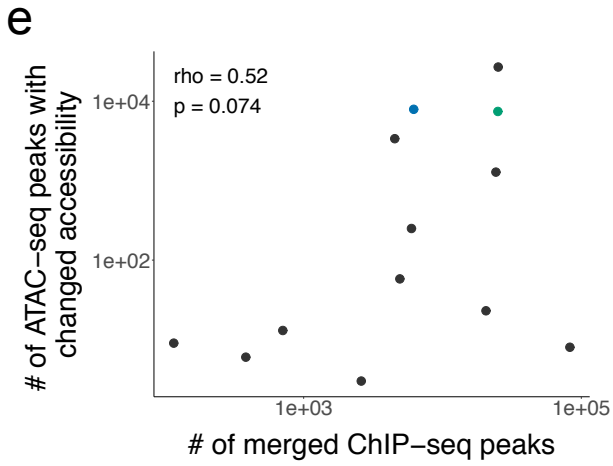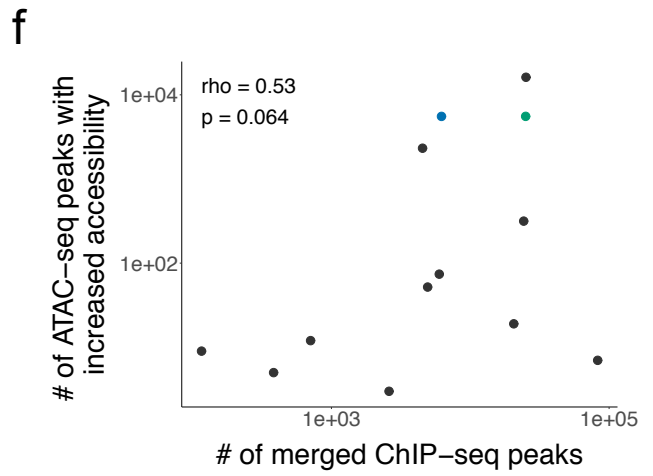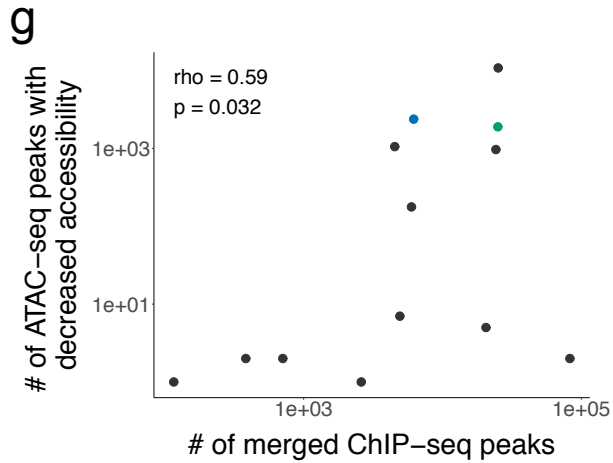

**Supplementary Figure 5: TF capacity to alter chromatin accessibility as a function of genome-wide occupancy and MBF. Related to Fig. 5.**

**a:** Correlation between the mitotic bound fraction and the fraction of occupied top motifs in closed chromatin regions (devoid of ATAC-seq peak). Duplicates are indicated for OCT4 (yellow), SOX2 (green), BHLHB8 (red), and FOXA1 (dark blue). The two FOXA1 mutants are shown in light blue. Triangles: TFs endogenously expressed in NIH-3T3. Circles: TFs not endogenously expressed in NIH-3T3. Error bars: SEM.

**b:** Heatmaps showing ChIP-seq signal (left) and log<sub>2</sub> ratio of ATAC-seq signal of TF overexpression over control (right) for all overexpressed factors 1 kb around the center of ChIP-seq peaks for each TF. Heatmaps are ordered vertically by log<sub>2</sub> ratio for each factor and horizontally by number of ChIP-seq peaks per factor.

**c:** Correlation between the number of ChIP-seq peaks for each TF and the number of TF ChIP-seq peaks with significant increase of chromatin accessibility upon overexpression of the TF. Known pioneers TFs are indicated in green (SOX2) and blue (FOXA1).

**d:** Correlation between the number of ChIP-seq peaks for each TF and the number of TF ChIP-seq peaks with significant decrease of chromatin accessibility upon overexpression of the TF. Same color-coding as Supplementary Fig. 5c.

**e:** Correlation between the number of ChIP-seq peaks for each TF and the number of ATAC-seq peaks with significant change in chromatin accessibility upon overexpression of the TF. Same color-coding as Supplementary Fig. 5c.

**f:** Correlation between the number of ChIP-seq peaks for each TF and the number of ATAC-seq peaks with significant increase of chromatin accessibility upon overexpression of the TF. Same color-coding as Supplementary Fig. 5c.

**g:** Correlation between the number of ChIP-seq peaks for each TF and the number of ATAC-seq peaks with significant decrease of chromatin accessibility upon overexpression of the TF. Same color-coding as Supplementary Fig. 5c.

Supplementary Table 1. Mitotic bound fraction measured on confocal and wide-field microscopes. Related to Supplementary Fig. 1.

| <b>Legend</b>                         | <b>Description</b>                                                                          |                                      |                                      |                                        |
|---------------------------------------|---------------------------------------------------------------------------------------------|--------------------------------------|--------------------------------------|----------------------------------------|
| <b>Transcription Factor</b>           | Name of the transcription factor                                                            |                                      |                                      |                                        |
| <b>MBF confocal microscope</b>        | Mitotic bound fraction measured by confocal microscopy                                      |                                      |                                      |                                        |
| <b>SEM (MBF confocal microscope)</b>  | Standard error of the mean for the mitotic bound fraction measured by confocal microscopy   |                                      |                                      |                                        |
| <b>MBF widefield microscope</b>       | Mitotic bound fraction measured by wide-field microscopy                                    |                                      |                                      |                                        |
| <b>SEM (MBF widefield microscope)</b> | Standard error of the mean for the mitotic bound fraction measured by wide-field microscopy |                                      |                                      |                                        |
| <b>Transcription Factor</b>           | <b>MBF confocal microscope [%]</b>                                                          | <b>SEM (MBF confocal microscope)</b> | <b>MBF wide-field microscope [%]</b> | <b>SEM (MBF wide-field microscope)</b> |
| Bhlhb8                                | 70.5                                                                                        | 3.4                                  | 55.8                                 | 4.6                                    |
| Cdx2                                  | 50.7                                                                                        | 3.3                                  | 37.1                                 | 7.1                                    |
| Dlx6                                  | 67.2                                                                                        | 4.3                                  | 58.4                                 | 6.2                                    |
| Foxa1                                 | 40.9                                                                                        | 2.6                                  | 46.8                                 | 8.6                                    |
| Hmga2                                 | 70.2                                                                                        | 6.3                                  | 52.6                                 | 10.2                                   |
| Hmgb2                                 | 58.4                                                                                        | 2.1                                  | 37.5                                 | 4.2                                    |
| Hmgn1                                 | 62.0                                                                                        | 4.5                                  | 43.4                                 | 4.5                                    |
| Hoxd10                                | 28.8                                                                                        | 1.1                                  | 16.2                                 | 1.3                                    |
| MafK                                  | 79.5                                                                                        | 11.3                                 | 79.6                                 | 7.7                                    |
| Max                                   | 67.4                                                                                        | 4.1                                  | 65.0                                 | 9.6                                    |
| Oct4                                  | 17.9                                                                                        | 0.8                                  | 19.8                                 | 1.6                                    |
| Sox15                                 | 38.8                                                                                        | 3.6                                  | 24.5                                 | 0.9                                    |
| Sox2                                  | 65.4                                                                                        | 8.9                                  | 47.7                                 | 4.9                                    |
| Tead1                                 | 44.0                                                                                        | 6.6                                  | 56.5                                 | 9.9                                    |
| Thap4                                 | 41.8                                                                                        | 5.8                                  | 31.5                                 | 2.4                                    |

Supplementary Table 2. Mitotic bound fraction per transcription factor and associated colocalization group. Related to Figure 1.

| Legend               | Description                                                                                                                               |
|----------------------|-------------------------------------------------------------------------------------------------------------------------------------------|
| Transcription Factor | Name of the transcription factor                                                                                                          |
| MBF                  | Mitotic bound fraction                                                                                                                    |
| SEM(MBF)             | Standard error of the mean for the mitotic bound fraction                                                                                 |
| n                    | Number of ES cells used for MBF quantification                                                                                            |
| Bin                  | Group associated to the transcription factor as a function of the colocalization on mitotic chromosomes: Depleted, Intermediate, Enriched |

  

| Transcription Factor | MBF [%] | SEM(MBF) | n  | Bin      |
|----------------------|---------|----------|----|----------|
| Creb3l2              | 7.62    | 1.14     | 9  | Depleted |
| Srebf2               | 7.91    | 0.87     | 10 | Depleted |
| Zfp84                | 7.92    | 0.65     | 18 | Depleted |
| Aire                 | 8.13    | 2.01     | 10 | Depleted |
| Tfam                 | 8.33    | 0.89     | 14 | Depleted |
| Zdhhc12              | 8.80    | 0.96     | 13 | Depleted |
| Creb3                | 8.96    | 0.54     | 9  | Depleted |
| Zdhhc3               | 8.99    | 0.76     | 10 | Depleted |
| Zdhhc7               | 9.18    | 0.56     | 11 | Depleted |
| Trmt1                | 9.35    | 1.24     | 12 | Depleted |
| Zdhhc4               | 9.43    | 0.88     | 14 | Depleted |
| Ikbgk                | 9.48    | 1.98     | 10 | Depleted |
| Dpm1                 | 9.50    | 0.80     | 21 | Depleted |
| Zdhhc16              | 9.67    | 1.22     | 6  | Depleted |
| Zdhhc19              | 10.36   | 1.05     | 12 | Depleted |
| Zkscan6              | 10.58   | 1.73     | 13 | Depleted |
| Dcun1d3              | 10.79   | 0.78     | 11 | Depleted |
| Pias3                | 10.82   | 1.47     | 10 | Depleted |
| Zdhhc20              | 11.01   | 0.87     | 13 | Depleted |
| A830053O21Rik        | 11.04   | 0.99     | 15 | Depleted |
| Zdhhc21              | 11.06   | 1.44     | 11 | Depleted |
| Zdhhc1               | 11.41   | 1.02     | 11 | Depleted |
| Lass2                | 11.67   | 0.52     | 10 | Depleted |
| C330016O10Rik        | 11.90   | 0.91     | 28 | Depleted |
| Mbnl3                | 11.97   | 1.09     | 10 | Depleted |
| Nupl2                | 11.99   | 0.83     | 13 | Depleted |
| Zdhhc9               | 12.02   | 0.92     | 13 | Depleted |
| Prr3                 | 12.50   | 1.72     | 11 | Depleted |
| 2410081M15Rik        | 12.70   | 1.53     | 11 | Depleted |
| Mael                 | 12.96   | 1.37     | 12 | Depleted |
| Zdhhc25              | 13.10   | 1.60     | 14 | Depleted |
| Lzts1                | 13.10   | 2.19     | 10 | Depleted |
| Dzip1                | 13.29   | 1.47     | 10 | Depleted |
| Zfp191               | 13.72   | 1.43     | 13 | Depleted |
| Hes2                 | 13.84   | 1.29     | 11 | Depleted |
| Hes3                 | 13.85   | 0.45     | 16 | Depleted |
| Zdhhc14              | 13.97   | 1.94     | 13 | Depleted |
| Sox13                | 13.97   | 1.38     | 11 | Depleted |
| Nr0b1                | 14.07   | 1.77     | 14 | Depleted |
| Hes5                 | 14.09   | 0.75     | 19 | Depleted |
| Zbtb20               | 14.09   | 0.89     | 17 | Depleted |
| Zfp687               | 14.14   | 1.63     | 11 | Depleted |
| Tbx10                | 14.16   | 2.82     | 10 | Depleted |
| Lin28                | 14.23   | 1.09     | 17 | Depleted |
| Tox                  | 14.24   | 1.27     | 13 | Depleted |
| Spert                | 14.26   | 1.05     | 11 | Depleted |
| Hoxa13               | 14.26   | 1.15     | 18 | Depleted |
| Mbnl2                | 14.29   | 1.09     | 11 | Depleted |
| Rabgef1              | 14.30   | 2.69     | 10 | Depleted |
| Gata5                | 14.38   | 2.20     | 11 | Depleted |
| L3mbtl               | 14.40   | 1.18     | 18 | Depleted |
| Tal2                 | 14.45   | 1.59     | 12 | Depleted |
| Phff1                | 14.49   | 2.48     | 11 | Depleted |
| Id1                  | 14.55   | 0.81     | 21 | Depleted |
| Olig3                | 14.61   | 1.22     | 5  | Depleted |
| Zfp740               | 14.62   | 1.52     | 10 | Depleted |
| Zfp282               | 14.79   | 1.17     | 10 | Depleted |
| Mef2c                | 14.85   | 2.26     | 10 | Depleted |
| Zc3hav1              | 14.85   | 1.76     | 13 | Depleted |
| Rbm10                | 14.86   | 0.55     | 13 | Depleted |
| Zbtb39               | 14.89   | 0.92     | 12 | Depleted |
| 6030490I01Rik        | 14.94   | 0.78     | 17 | Depleted |
| Bcl6b                | 14.97   | 0.78     | 12 | Depleted |
| Zfp661               | 14.99   | 1.28     | 14 | Depleted |
| Zfp346               | 14.99   | 1.61     | 10 | Depleted |
| A1894139             | 15.07   | 0.78     | 15 | Depleted |
| Fam164a              | 15.08   | 0.63     | 18 | Depleted |
| Mbnl1                | 15.16   | 1.36     | 10 | Depleted |
| Bach2                | 15.17   | 0.98     | 19 | Depleted |
| Lzts2                | 15.23   | 1.38     | 22 | Depleted |
| Mkm2                 | 15.32   | 1.03     | 11 | Depleted |
| Zfp365               | 15.32   | 0.69     | 11 | Depleted |
| Prosapip1            | 15.37   | 0.53     | 15 | Depleted |
| Foxp2                | 15.38   | 1.10     | 14 | Depleted |
| Mef2b                | 15.39   | 0.74     | 12 | Depleted |
| Zfp521               | 15.45   | 1.22     | 13 | Depleted |
| Rnf113a2             | 15.46   | 1.53     | 14 | Depleted |
| Smad2                | 15.47   | 1.46     | 10 | Depleted |
| Stat1                | 15.50   | 1.10     | 10 | Depleted |
| Rogdi                | 15.59   | 0.41     | 15 | Depleted |
| Pbrm1                | 15.61   | 1.30     | 12 | Depleted |

|               |       |      |    |              |
|---------------|-------|------|----|--------------|
| Zfp446        | 15.62 | 1.38 | 11 | Depleted     |
| Dmrtc2        | 15.66 | 0.59 | 13 | Depleted     |
| Rela          | 15.71 | 1.33 | 13 | Depleted     |
| Mkm1          | 15.73 | 2.52 | 15 | Depleted     |
| Stat3         | 15.82 | 1.07 | 13 | Depleted     |
| Ahr           | 15.83 | 0.82 | 10 | Depleted     |
| Arnt          | 15.84 | 0.95 | 17 | Depleted     |
| Hmbox1        | 15.89 | 1.35 | 12 | Depleted     |
| Tulp3         | 15.91 | 1.42 | 10 | Depleted     |
| 6430604K15Rik | 15.92 | 0.88 | 18 | Depleted     |
| Zfp92         | 15.95 | 0.74 | 10 | Depleted     |
| Pknox1        | 15.95 | 1.98 | 12 | Depleted     |
| Pbx1          | 15.99 | 0.90 | 12 | Depleted     |
| Ikzf5         | 16.01 | 1.40 | 19 | Depleted     |
| Zbtb12        | 16.02 | 1.26 | 10 | Depleted     |
| Zfp692        | 16.03 | 1.45 | 15 | Depleted     |
| Tshz1         | 16.03 | 1.20 | 19 | Depleted     |
| Mef2a         | 16.09 | 0.76 | 14 | Depleted     |
| Ascl3         | 16.14 | 1.02 | 10 | Depleted     |
| Arid3a        | 16.16 | 1.47 | 11 | Depleted     |
| Hoxd10        | 16.16 | 1.29 | 11 | Depleted     |
| Zfp647        | 16.16 | 2.03 | 11 | Depleted     |
| Gmeb1         | 16.17 | 1.54 | 11 | Depleted     |
| Zkscan1       | 16.20 | 0.89 | 10 | Depleted     |
| Ahr           | 16.23 | 1.76 | 12 | Depleted     |
| Zfp108        | 16.24 | 0.25 | 11 | Depleted     |
| Tut1          | 16.26 | 1.09 | 12 | Depleted     |
| Mnt           | 16.28 | 0.95 | 22 | Depleted     |
| Foxm1         | 16.28 | 2.15 | 10 | Depleted     |
| Nanog         | 16.29 | 0.97 | 10 | Depleted     |
| Sall3         | 16.37 | 1.03 | 11 | Depleted     |
| Zfp57         | 16.38 | 2.40 | 10 | Depleted     |
| Spdef         | 16.40 | 0.90 | 11 | Depleted     |
| Klf1          | 16.44 | 0.98 | 11 | Depleted     |
| Klf4          | 16.45 | 1.56 | 13 | Depleted     |
| Tcf23         | 16.45 | 0.71 | 10 | Depleted     |
| Zfp536        | 16.47 | 0.75 | 10 | Depleted     |
| Lztr1         | 16.54 | 1.24 | 10 | Intermediate |
| Lhx9          | 16.54 | 0.69 | 11 | Intermediate |
| Zfp449        | 16.59 | 0.66 | 10 | Intermediate |
| Fos1          | 16.59 | 0.80 | 12 | Intermediate |
| Rbm22         | 16.62 | 0.74 | 11 | Intermediate |
| Rcor2         | 16.64 | 1.47 | 15 | Intermediate |
| Vdr           | 16.70 | 1.11 | 13 | Intermediate |
| Zfp414        | 16.77 | 1.40 | 11 | Intermediate |
| Zbtb48        | 16.80 | 1.02 | 12 | Intermediate |
| Npas4         | 16.82 | 1.28 | 11 | Intermediate |
| Gm1008        | 16.82 | 0.97 | 10 | Intermediate |
| A630042L21Rik | 16.83 | 2.22 | 12 | Intermediate |
| Pou6f2        | 16.90 | 0.53 | 10 | Intermediate |
| Spic          | 16.95 | 0.71 | 12 | Intermediate |
| Zgpat         | 16.95 | 1.13 | 10 | Intermediate |
| Zkscan14      | 16.97 | 1.08 | 23 | Intermediate |
| Rhox4a        | 16.97 | 1.01 | 17 | Intermediate |
| Spz1          | 16.98 | 0.66 | 15 | Intermediate |
| Gli1          | 16.99 | 1.10 | 10 | Intermediate |
| Tbx20         | 16.99 | 0.53 | 10 | Intermediate |
| Hnf1a         | 17.00 | 0.56 | 11 | Intermediate |
| Zfp120        | 17.01 | 0.54 | 11 | Intermediate |
| Csde1         | 17.02 | 0.58 | 11 | Intermediate |
| Zfp639        | 17.03 | 0.77 | 12 | Intermediate |
| Gmeb2         | 17.05 | 0.81 | 12 | Intermediate |
| Zfp61         | 17.07 | 1.11 | 12 | Intermediate |
| Zochc4        | 17.08 | 0.86 | 10 | Intermediate |
| Bcl11a        | 17.08 | 1.03 | 12 | Intermediate |
| Ecd           | 17.10 | 0.57 | 13 | Intermediate |
| Tox3          | 17.11 | 1.07 | 10 | Intermediate |
| Zfp238        | 17.11 | 0.70 | 11 | Intermediate |
| Rfx1          | 17.14 | 0.52 | 12 | Intermediate |
| Nhlh1         | 17.15 | 0.83 | 16 | Intermediate |
| Tcf7          | 17.16 | 0.98 | 11 | Intermediate |
| Meis2         | 17.19 | 0.62 | 13 | Intermediate |
| Gbx2          | 17.20 | 0.88 | 12 | Intermediate |
| BC023179      | 17.20 | 0.54 | 10 | Intermediate |
| Dcun1d1       | 17.20 | 2.06 | 12 | Intermediate |
| Klf2          | 17.21 | 1.07 | 14 | Intermediate |
| Npas2         | 17.23 | 1.09 | 10 | Intermediate |
| Pou6f1        | 17.23 | 2.06 | 12 | Intermediate |
| Nufip1        | 17.23 | 1.59 | 14 | Intermediate |
| Zfp809        | 17.25 | 0.89 | 10 | Intermediate |
| Nr2c1         | 17.26 | 1.26 | 10 | Intermediate |
| Fiz1          | 17.26 | 0.86 | 18 | Intermediate |
| Neil3         | 17.26 | 0.76 | 11 | Intermediate |
| Tead4         | 17.27 | 0.53 | 10 | Intermediate |
| Hnf4g         | 17.31 | 0.58 | 10 | Intermediate |
| Ctcf          | 17.31 | 1.80 | 15 | Intermediate |
| 2810426N06Rik | 17.34 | 0.68 | 10 | Intermediate |
| Erf           | 17.35 | 0.75 | 14 | Intermediate |
| Arnt2         | 17.36 | 1.83 | 18 | Intermediate |
| Bach1         | 17.36 | 0.60 | 9  | Intermediate |
| Zfp513        | 17.38 | 0.58 | 15 | Intermediate |
| Hoxb7         | 17.38 | 1.24 | 12 | Intermediate |



|               |       |      |    |              |
|---------------|-------|------|----|--------------|
| Chrac1        | 17.47 | 0.84 | 12 | Intermediate |
| Fos           | 17.49 | 1.26 | 8  | Intermediate |
| Foxp1         | 17.51 | 2.13 | 10 | Intermediate |
| Arntl         | 17.51 | 1.42 | 11 | Intermediate |
| Zfp7          | 17.52 | 1.18 | 8  | Intermediate |
| Zfp219        | 17.54 | 1.49 | 17 | Intermediate |
| Zfp704        | 17.54 | 1.50 | 12 | Intermediate |
| Isx           | 17.55 | 0.67 | 12 | Intermediate |
| Fezf2         | 17.55 | 1.14 | 9  | Intermediate |
| Hesx1         | 17.60 | 0.68 | 8  | Intermediate |
| Alx4          | 17.61 | 2.18 | 13 | Intermediate |
| Zscan18       | 17.61 | 0.61 | 13 | Intermediate |
| Nr4a1         | 17.62 | 0.72 | 13 | Intermediate |
| BC043301      | 17.62 | 0.92 | 12 | Intermediate |
| Hes7          | 17.66 | 1.03 | 14 | Intermediate |
| Tbx19         | 17.67 | 0.54 | 11 | Intermediate |
| Foxi2         | 17.67 | 1.51 | 14 | Intermediate |
| Ddit3         | 17.68 | 0.60 | 14 | Intermediate |
| Msgn1         | 17.70 | 2.33 | 16 | Intermediate |
| Pax3          | 17.70 | 2.41 | 8  | Intermediate |
| Zmat2         | 17.71 | 1.15 | 11 | Intermediate |
| Rhox6         | 17.71 | 1.86 | 11 | Intermediate |
| Sp3           | 17.71 | 1.57 | 10 | Intermediate |
| Ep300         | 17.73 | 0.72 | 10 | Intermediate |
| Zscan2        | 17.74 | 1.14 | 14 | Intermediate |
| A830023112Rik | 17.76 | 1.09 | 13 | Intermediate |
| Tbx15         | 17.78 | 0.90 | 14 | Intermediate |
| Tbx22         | 17.78 | 2.16 | 10 | Intermediate |
| Zfp12         | 17.80 | 0.72 | 11 | Intermediate |
| Zfp358        | 17.81 | 1.49 | 11 | Intermediate |
| Gtf3a         | 17.86 | 0.85 | 11 | Intermediate |
| Adnp2         | 17.89 | 0.70 | 11 | Intermediate |
| Egr1          | 17.89 | 1.15 | 9  | Intermediate |
| Zfp85-rs1     | 17.92 | 0.98 | 10 | Intermediate |
| Zfp46         | 17.93 | 0.88 | 11 | Intermediate |
| Lhx3          | 17.93 | 1.47 | 13 | Intermediate |
| Smarcc1       | 17.97 | 0.96 | 11 | Intermediate |
| Usf1          | 18.00 | 1.76 | 12 | Intermediate |
| Relb          | 18.01 | 0.89 | 13 | Intermediate |
| Fosl2         | 18.05 | 1.16 | 25 | Intermediate |
| Mycn          | 18.06 | 0.59 | 16 | Intermediate |
| Jazf1         | 18.10 | 1.09 | 11 | Intermediate |
| Bmyc          | 18.10 | 1.26 | 5  | Intermediate |
| Zscan21       | 18.11 | 1.57 | 10 | Intermediate |
| Klf5          | 18.12 | 1.09 | 10 | Intermediate |
| Egr2          | 18.13 | 0.54 | 17 | Intermediate |
| Hoxb5         | 18.14 | 0.67 | 14 | Intermediate |
| Zfp14         | 18.16 | 0.81 | 12 | Intermediate |
| Tsc22d3       | 18.16 | 1.40 | 14 | Intermediate |
| tcf7          | 18.17 | 0.73 | 10 | Intermediate |
| Esr2          | 18.18 | 1.25 | 11 | Intermediate |
| Prrxl1        | 18.18 | 1.00 | 11 | Intermediate |
| Batf2         | 18.19 | 1.10 | 10 | Intermediate |
| Tcfcp2l1      | 18.22 | 0.86 | 13 | Intermediate |
| Sall4         | 18.23 | 1.11 | 14 | Intermediate |
| Churc1        | 18.28 | 0.44 | 11 | Intermediate |
| Zfp689        | 18.29 | 0.86 | 12 | Intermediate |
| Mizf          | 18.30 | 1.32 | 10 | Intermediate |
| Snai3         | 18.30 | 1.11 | 8  | Intermediate |
| Zfp593        | 18.30 | 2.51 | 18 | Intermediate |
| Carhsp1       | 18.31 | 0.82 | 10 | Intermediate |
| Mta1          | 18.35 | 0.61 | 12 | Intermediate |
| Gtf2h2        | 18.37 | 1.51 | 6  | Intermediate |
| Mbd3          | 18.38 | 0.76 | 12 | Intermediate |
| Bloc1s1       | 18.39 | 1.38 | 10 | Intermediate |
| Neurog1       | 18.40 | 1.20 | 21 | Intermediate |
| Zic3          | 18.41 | 1.01 | 13 | Intermediate |
| Mitf          | 18.41 | 0.95 | 12 | Intermediate |
| Lin28b        | 18.41 | 3.35 | 18 | Intermediate |
| Foxn4         | 18.41 | 0.89 | 12 | Intermediate |
| Hey1          | 18.44 | 1.72 | 13 | Intermediate |
| Zfp526        | 18.46 | 0.54 | 13 | Intermediate |
| Zhx2          | 18.47 | 0.81 | 10 | Intermediate |
| sox7          | 18.47 | 0.62 | 13 | Intermediate |
| D330038O06Rik | 18.47 | 0.90 | 10 | Intermediate |
| Hmgb4         | 18.48 | 0.71 | 11 | Intermediate |
| Zfp523        | 18.51 | 0.92 | 10 | Intermediate |
| lirk          | 18.52 | 0.86 | 14 | Intermediate |
| Zfp335        | 18.52 | 0.55 | 10 | Intermediate |
| Stat4         | 18.52 | 1.36 | 10 | Intermediate |
| Alx1          | 18.55 | 0.46 | 11 | Intermediate |
| Tulp1         | 18.59 | 1.28 | 12 | Intermediate |
| Dlx4          | 18.59 | 0.79 | 14 | Intermediate |
| Gabpa         | 18.60 | 2.21 | 13 | Intermediate |
| Zfp423        | 18.61 | 0.87 | 17 | Intermediate |
| Toe1          | 18.63 | 1.07 | 15 | Intermediate |
| Zfp629        | 18.65 | 1.07 | 10 | Intermediate |
| Tfdp1         | 18.67 | 0.76 | 8  | Intermediate |
| Tcf3          | 18.67 | 1.34 | 10 | Intermediate |
| Zbtb5         | 18.67 | 0.99 | 10 | Intermediate |
| Rhox9         | 18.68 | 1.36 | 11 | Intermediate |
| Twist2        | 18.70 | 1.06 | 10 | Intermediate |

|           |       |      |    |              |
|-----------|-------|------|----|--------------|
| Tox4      | 18.72 | 0.56 | 17 | Intermediate |
| E2f6      | 18.72 | 0.83 | 12 | Intermediate |
| Ferd3l    | 18.75 | 1.39 | 10 | Intermediate |
| Zbed4     | 18.77 | 1.14 | 13 | Intermediate |
| Irx5      | 18.77 | 0.71 | 10 | Intermediate |
| Thap3     | 18.82 | 1.04 | 11 | Intermediate |
| Nr4a2     | 18.83 | 1.13 | 12 | Intermediate |
| Prox2     | 18.83 | 1.39 | 24 | Intermediate |
| Ppp1r10   | 18.83 | 1.29 | 11 | Intermediate |
| Zfp42     | 18.85 | 0.83 | 11 | Intermediate |
| Id3       | 18.85 | 2.99 | 11 | Intermediate |
| Id2       | 18.86 | 1.24 | 12 | Intermediate |
| Batf3     | 18.87 | 1.13 | 15 | Intermediate |
| Brachyury | 18.87 | 1.13 | 15 | Intermediate |
| Patz1     | 18.87 | 0.38 | 13 | Intermediate |
| Zc3h8     | 18.91 | 0.49 | 10 | Intermediate |
| Atf7      | 18.92 | 0.70 | 12 | Intermediate |
| Sp2       | 18.93 | 1.63 | 5  | Intermediate |
| Tada2l    | 18.94 | 0.80 | 10 | Intermediate |
| Ets2      | 18.95 | 1.09 | 10 | Intermediate |
| Vsx2      | 18.96 | 0.98 | 10 | Intermediate |
| Zfp9      | 18.97 | 0.89 | 10 | Intermediate |
| Bhlhb4    | 19.01 | 1.17 | 16 | Intermediate |
| Hoxa7     | 19.04 | 2.00 | 15 | Intermediate |
| Pogz      | 19.06 | 0.89 | 14 | Intermediate |
| Lhx4      | 19.07 | 1.20 | 13 | Intermediate |
| Dr1       | 19.09 | 0.80 | 9  | Intermediate |
| Zfp488    | 19.12 | 1.31 | 12 | Intermediate |
| Foxp3     | 19.13 | 1.02 | 18 | Intermediate |
| Pbx2      | 19.13 | 0.98 | 11 | Intermediate |
| Tcf21     | 19.14 | 1.62 | 14 | Intermediate |
| Zfp553    | 19.15 | 1.00 | 12 | Intermediate |
| Lmx1b     | 19.15 | 1.75 | 11 | Intermediate |
| Rreb1     | 19.16 | 0.75 | 15 | Intermediate |
| Mta2      | 19.17 | 1.07 | 13 | Intermediate |
| Smad3     | 19.26 | 1.55 | 13 | Intermediate |
| Tcfec     | 19.27 | 1.05 | 11 | Intermediate |
| Hoxa6     | 19.27 | 1.75 | 11 | Intermediate |
| Hmg20a    | 19.31 | 1.31 | 10 | Intermediate |
| Stat5a    | 19.32 | 2.14 | 10 | Intermediate |
| Vps72     | 19.32 | 2.14 | 10 | Intermediate |
| Msc       | 19.33 | 0.70 | 14 | Intermediate |
| Rxrg      | 19.35 | 1.07 | 12 | Intermediate |
| Trerf1    | 19.35 | 1.32 | 12 | Intermediate |
| Zc3h15    | 19.42 | 2.97 | 10 | Intermediate |
| Zfp568    | 19.43 | 2.15 | 21 | Intermediate |
| Repin1    | 19.49 | 0.87 | 12 | Intermediate |
| Edf1      | 19.52 | 1.19 | 16 | Intermediate |
| Rfx3      | 19.60 | 1.44 | 14 | Intermediate |
| Dmrt1     | 19.61 | 2.41 | 14 | Intermediate |
| Mxd1      | 19.62 | 0.60 | 11 | Intermediate |
| Neurog3   | 19.63 | 1.17 | 11 | Intermediate |
| Nobox     | 19.64 | 1.31 | 12 | Intermediate |
| Hopx      | 19.65 | 1.03 | 10 | Intermediate |
| Klf10     | 19.65 | 1.21 | 11 | Intermediate |
| Evi1      | 19.68 | 1.55 | 16 | Intermediate |
| Irx4      | 19.70 | 0.88 | 11 | Intermediate |
| Irf6      | 19.71 | 0.75 | 10 | Intermediate |
| Nkx3-1    | 19.73 | 1.07 | 12 | Intermediate |
| Zfp462    | 19.78 | 1.02 | 10 | Intermediate |
| Oct4      | 19.80 | 1.56 | 15 | Intermediate |
| Zfp131    | 19.81 | 0.61 | 13 | Intermediate |
| Zfp280b   | 19.86 | 1.34 | 12 | Intermediate |
| Fkh18     | 19.87 | 0.34 | 12 | Intermediate |
| Bhlhb2    | 19.87 | 1.13 | 13 | Intermediate |
| sox8      | 19.96 | 2.46 | 12 | Intermediate |
| Glis2     | 20.06 | 0.99 | 11 | Intermediate |
| Hoxc5     | 20.07 | 0.76 | 11 | Intermediate |
| Tcfap4    | 20.08 | 2.50 | 10 | Intermediate |
| Tgif1     | 20.11 | 1.10 | 8  | Intermediate |
| Lmx1a     | 20.13 | 1.80 | 11 | Intermediate |
| Atf1      | 20.15 | 1.45 | 11 | Intermediate |
| Tead2     | 20.20 | 1.37 | 12 | Intermediate |
| Zfp641    | 20.21 | 1.01 | 11 | Intermediate |
| Lhx5      | 20.26 | 1.01 | 12 | Intermediate |
| Six1      | 20.26 | 1.77 | 11 | Intermediate |
| Klf11     | 20.28 | 1.50 | 11 | Intermediate |
| Rbpjl     | 20.31 | 0.55 | 20 | Intermediate |
| Tcf3      | 20.32 | 1.43 | 10 | Intermediate |
| Ief1      | 20.32 | 0.96 | 14 | Intermediate |
| Maz       | 20.39 | 1.86 | 15 | Intermediate |
| Pif1a     | 20.45 | 2.86 | 12 | Intermediate |
| Zfp334    | 20.46 | 0.89 | 10 | Intermediate |
| Klf12     | 20.52 | 2.54 | 11 | Intermediate |
| Rhox12    | 20.53 | 1.15 | 16 | Intermediate |
| Zfp281    | 20.54 | 0.78 | 15 | Intermediate |
| Ascl2     | 20.59 | 0.62 | 15 | Intermediate |
| Ppara     | 20.60 | 3.76 | 14 | Intermediate |
| Neurog2   | 20.69 | 1.66 | 14 | Intermediate |
| Pdx1      | 20.98 | 0.64 | 13 | Intermediate |
| Hmgb2l1   | 21.03 | 3.81 | 10 | Intermediate |
| Tbx21     | 21.06 | 1.11 | 11 | Intermediate |

|         |       |      |    |              |
|---------|-------|------|----|--------------|
| Pitx1   | 21.13 | 1.09 | 14 | Intermediate |
| Rorc    | 21.17 | 1.56 | 8  | Intermediate |
| Aatf    | 21.18 | 3.59 | 10 | Intermediate |
| Otx2    | 21.33 | 1.87 | 6  | Intermediate |
| Hey2    | 21.40 | 1.85 | 16 | Intermediate |
| Csdc2   | 21.42 | 2.05 | 10 | Intermediate |
| E2f3    | 21.42 | 2.28 | 16 | Intermediate |
| Esrra   | 21.43 | 1.66 | 8  | Intermediate |
| Irf3    | 21.43 | 1.87 | 16 | Intermediate |
| Gatad2b | 21.44 | 1.28 | 11 | Intermediate |
| Rcor1   | 21.50 | 1.22 | 10 | Intermediate |
| Tbx3    | 21.59 | 1.72 | 15 | Intermediate |
| Msx1    | 21.66 | 1.53 | 10 | Intermediate |
| Zic1    | 21.71 | 0.98 | 16 | Intermediate |
| Pou2f2  | 21.76 | 1.27 | 12 | Intermediate |
| Baz2b   | 21.80 | 0.96 | 12 | Intermediate |
| Gcm2    | 21.86 | 2.22 | 13 | Intermediate |
| Zfp710  | 21.89 | 1.18 | 10 | Intermediate |
| Nkx2-6  | 21.89 | 1.32 | 10 | Intermediate |
| Esrrb   | 21.91 | 1.12 | 12 | Intermediate |
| Ets1    | 22.05 | 1.76 | 11 | Intermediate |
| Hoxd3   | 22.10 | 2.12 | 10 | Intermediate |
| Atf3    | 22.27 | 1.19 | 12 | Intermediate |
| Pias1   | 22.44 | 1.12 | 13 | Intermediate |
| Lhx6    | 22.56 | 4.95 | 15 | Intermediate |
| Rhox10  | 22.59 | 0.93 | 10 | Intermediate |
| Pitx2   | 22.68 | 1.63 | 11 | Intermediate |
| Cdx4    | 22.69 | 0.71 | 19 | Intermediate |
| Tcfap2d | 22.80 | 1.28 | 12 | Intermediate |
| Mycs    | 22.80 | 3.34 | 16 | Intermediate |
| Zfp467  | 22.90 | 0.68 | 14 | Intermediate |
| Myst2   | 22.92 | 1.93 | 11 | Intermediate |
| Foxn3   | 22.94 | 0.87 | 10 | Intermediate |
| En2     | 23.02 | 1.84 | 9  | Enriched     |
| Sp140   | 23.04 | 1.39 | 12 | Enriched     |
| Bbx     | 23.21 | 2.66 | 10 | Enriched     |
| Tef     | 23.23 | 1.64 | 7  | Enriched     |
| Hoxc10  | 23.27 | 1.26 | 14 | Enriched     |
| Drap1   | 23.46 | 1.06 | 16 | Enriched     |
| Hoxb2   | 23.51 | 1.37 | 11 | Enriched     |
| Nfyb    | 23.65 | 1.50 | 11 | Enriched     |
| Dlx3    | 23.66 | 0.89 | 12 | Enriched     |
| Tulp4   | 23.68 | 1.72 | 12 | Enriched     |
| Rxra    | 23.76 | 3.98 | 13 | Enriched     |
| Sp4     | 23.82 | 1.48 | 12 | Enriched     |
| Elf1    | 23.83 | 3.59 | 12 | Enriched     |
| Zfp37   | 24.09 | 1.73 | 11 | Enriched     |
| Nfib    | 24.15 | 3.37 | 12 | Enriched     |
| Ubtf    | 24.16 | 1.69 | 16 | Enriched     |
| Tgif2lx | 24.33 | 0.99 | 13 | Enriched     |
| Gata1   | 24.36 | 2.01 | 13 | Enriched     |
| Zfp422  | 24.37 | 1.12 | 13 | Enriched     |
| Sox17   | 24.44 | 1.19 | 10 | Enriched     |
| Elf2    | 24.49 | 1.19 | 13 | Enriched     |
| Sox15   | 24.50 | 0.86 | 12 | Enriched     |
| Gcm1    | 24.52 | 3.30 | 12 | Enriched     |
| Tgif2   | 24.92 | 1.67 | 12 | Enriched     |
| Yy1     | 25.00 | 4.27 | 13 | Enriched     |
| Sfp1    | 25.11 | 2.25 | 6  | Enriched     |
| Nfil3   | 25.20 | 2.32 | 10 | Enriched     |
| Hoxa9   | 25.49 | 4.86 | 24 | Enriched     |
| Nfia    | 25.64 | 2.50 | 10 | Enriched     |
| Zscan20 | 25.66 | 5.28 | 10 | Enriched     |
| Zscan4c | 25.66 | 5.28 | 10 | Enriched     |
| Nfyc    | 25.71 | 2.81 | 12 | Enriched     |
| Pax8    | 25.72 | 1.35 | 12 | Enriched     |
| Barx1   | 26.02 | 1.23 | 7  | Enriched     |
| Sox10   | 26.11 | 3.74 | 10 | Enriched     |
| Barhl2  | 26.24 | 2.72 | 13 | Enriched     |
| Zfp524  | 26.31 | 1.95 | 11 | Enriched     |
| Meox2   | 26.85 | 2.56 | 11 | Enriched     |
| Phf20   | 26.91 | 3.91 | 10 | Enriched     |
| Thra    | 27.02 | 3.38 | 12 | Enriched     |
| Zfp41   | 27.20 | 1.96 | 10 | Enriched     |
| Elk3    | 27.27 | 1.53 | 12 | Enriched     |
| Grhl2   | 27.47 | 3.10 | 18 | Enriched     |
| Elk1    | 27.68 | 1.23 | 8  | Enriched     |
| Rhox11  | 28.23 | 1.65 | 14 | Enriched     |
| Irf9    | 28.31 | 1.61 | 10 | Enriched     |
| cbx2    | 28.51 | 4.12 | 13 | Enriched     |
| Six2    | 28.79 | 4.72 | 15 | Enriched     |
| Elf4    | 29.15 | 2.48 | 12 | Enriched     |
| Grhl1   | 29.16 | 6.48 | 10 | Enriched     |
| Ebf2    | 29.30 | 2.67 | 9  | Enriched     |
| Irf8    | 29.36 | 3.61 | 11 | Enriched     |
| Nfkb1   | 30.28 | 3.50 | 16 | Enriched     |
| Pax2    | 30.81 | 1.61 | 16 | Enriched     |
| Nr2f6   | 30.92 | 2.84 | 11 | Enriched     |
| Zfp280c | 31.02 | 4.45 | 10 | Enriched     |
| Thap4   | 31.50 | 2.39 | 15 | Enriched     |
| Hoxa3   | 31.51 | 2.89 | 17 | Enriched     |
| Onecut2 | 31.67 | 2.75 | 15 | Enriched     |

|               |       |       |    |          |
|---------------|-------|-------|----|----------|
| Gata2         | 31.78 | 2.32  | 22 | Enriched |
| Rfx5          | 32.28 | 5.18  | 16 | Enriched |
| Fli1          | 32.74 | 2.39  | 11 | Enriched |
| Gata3         | 32.94 | 1.69  | 10 | Enriched |
| Mafb          | 33.79 | 3.37  | 11 | Enriched |
| Rfx2          | 34.64 | 2.66  | 13 | Enriched |
| Creb1         | 34.71 | 6.85  | 8  | Enriched |
| 1700029101Rik | 35.09 | 6.22  | 11 | Enriched |
| Smad4         | 35.23 | 10.52 | 15 | Enriched |
| Ebf1          | 35.57 | 3.25  | 17 | Enriched |
| Tcfap2b       | 36.10 | 2.57  | 13 | Enriched |
| Tcfap2c       | 36.24 | 3.15  | 11 | Enriched |
| Cdx2          | 37.09 | 7.06  | 13 | Enriched |
| Irf2          | 37.26 | 3.16  | 10 | Enriched |
| Vax2          | 37.35 | 4.47  | 12 | Enriched |
| Hmgb2         | 37.49 | 4.21  | 12 | Enriched |
| Zfp161        | 37.53 | 5.28  | 16 | Enriched |
| Mbd1          | 38.07 | 5.30  | 11 | Enriched |
| Hoxb13        | 38.55 | 3.34  | 13 | Enriched |
| Mbd4          | 39.20 | 6.31  | 10 | Enriched |
| Pou1f1        | 39.22 | 8.55  | 12 | Enriched |
| hmgb3         | 39.94 | 3.37  | 12 | Enriched |
| Elf5          | 40.02 | 5.03  | 12 | Enriched |
| Zfp202        | 40.50 | 7.06  | 13 | Enriched |
| Six6          | 40.68 | 4.30  | 10 | Enriched |
| Tcfap2a       | 41.22 | 3.87  | 16 | Enriched |
| Cebpe         | 41.58 | 4.60  | 12 | Enriched |
| Irf4          | 41.80 | 5.24  | 12 | Enriched |
| Lcor          | 42.21 | 4.70  | 14 | Enriched |
| Jundm2        | 42.39 | 9.30  | 12 | Enriched |
| Irf1          | 42.53 | 5.83  | 9  | Enriched |
| Thap7         | 42.56 | 4.44  | 11 | Enriched |
| Pias4         | 43.06 | 4.47  | 12 | Enriched |
| Hmgn1         | 43.42 | 4.50  | 12 | Enriched |
| Hlf           | 43.66 | 3.94  | 11 | Enriched |
| Zfp319        | 44.44 | 6.21  | 11 | Enriched |
| Duxbl         | 45.17 | 3.44  | 13 | Enriched |
| Ebf3          | 45.82 | 6.75  | 10 | Enriched |
| Dlx1          | 46.38 | 9.04  | 10 | Enriched |
| Foxa1         | 46.84 | 8.55  | 12 | Enriched |
| Sox2          | 47.70 | 4.86  | 15 | Enriched |
| Hmgn3         | 50.05 | 4.05  | 19 | Enriched |
| Nr1i2         | 52.11 | 5.19  | 11 | Enriched |
| hmga2         | 52.62 | 10.20 | 10 | Enriched |
| Bhlhb8        | 55.80 | 4.65  | 13 | Enriched |
| Tead1         | 56.49 | 9.93  | 12 | Enriched |
| Dlx6          | 58.39 | 6.25  | 22 | Enriched |
| Srcap         | 58.60 | 9.45  | 12 | Enriched |
| Max           | 65.00 | 9.62  | 18 | Enriched |
| Mafq          | 69.70 | 11.22 | 17 | Enriched |
| Zfp512        | 75.93 | 12.24 | 19 | Enriched |
| Mafk          | 79.61 | 7.73  | 11 | Enriched |

Supplementary Table 3. Mitotic bound fraction measured in NIH-3T3 and E14 cells. Related to Supplementary Fig. 1.

| <b>Legend</b>                | <b>Description</b>                                                                  |                            |                    |                             |                              |
|------------------------------|-------------------------------------------------------------------------------------|----------------------------|--------------------|-----------------------------|------------------------------|
| <b>Transcription Factor</b>  | Name of the transcription factor                                                    |                            |                    |                             |                              |
| <b>MBF in NIH-3T3</b>        | Mitotic bound fraction measured in NIH-3T3 cells                                    |                            |                    |                             |                              |
| <b>SEM(MBF in NIH-3T3)</b>   | Standard error of the mean for the mitotic bound fraction measured in NIH-3T3 cells |                            |                    |                             |                              |
| <b>n (NIH-3T3)</b>           | Number of cells used to quantify MBF in NIH-3T3 cells                               |                            |                    |                             |                              |
| <b>MBF in E14 cells</b>      | Mitotic bound fraction measured in ES cells [%]                                     |                            |                    |                             |                              |
| <b>SEM(MBF in E14 cells)</b> | Standard error of the mean for the mitotic bound fraction measured in ES cells      |                            |                    |                             |                              |
|                              |                                                                                     |                            |                    |                             |                              |
| <b>Transcription Factor</b>  | <b>MBF in NIH-3T3 [%]</b>                                                           | <b>SEM(MBF in NIH-3T3)</b> | <b>n (NIH-3T3)</b> | <b>MBF in E14 cells [%]</b> | <b>SEM(MBF in E14 cells)</b> |
| Cdx4                         | 20.5                                                                                | 0.4                        | 12                 | 22.7                        | 0.7                          |
| Ebf3                         | 27.6                                                                                | 3.3                        | 6                  | 45.8                        | 6.8                          |
| Fam164a                      | 14.5                                                                                | 0.5                        | 10                 | 15.1                        | 0.6                          |
| Hmgn1                        | 57.9                                                                                | 6.9                        | 10                 | 43.4                        | 4.5                          |
| Mbd3                         | 15.1                                                                                | 0.1                        | 10                 | 18.4                        | 0.8                          |
| Nobox                        | 23.8                                                                                | 1.0                        | 10                 | 19.6                        | 1.3                          |
| Npas4                        | 14.3                                                                                | 0.3                        | 10                 | 16.8                        | 1.3                          |
| Nr0b1                        | 14.5                                                                                | 0.7                        | 10                 | 14.1                        | 1.8                          |
| Rbm22                        | 16.3                                                                                | 0.5                        | 10                 | 16.6                        | 0.7                          |
| Rhox10                       | 18.7                                                                                | 0.7                        | 11                 | 22.6                        | 0.9                          |
| Sox10                        | 39.3                                                                                | 6.9                        | 4                  | 26.1                        | 3.7                          |
| Sox15                        | 35.2                                                                                | 4.2                        | 10                 | 24.5                        | 0.9                          |
| Sox2                         | 58.7                                                                                | 5.2                        | 5                  | 47.7                        | 4.9                          |
| Thap4                        | 43.1                                                                                | 3.9                        | 10                 | 31.5                        | 2.4                          |
| Thap7                        | 41.3                                                                                | 3.3                        | 11                 | 42.6                        | 4.4                          |
| Zfp280b                      | 20.5                                                                                | 0.4                        | 10                 | 19.9                        | 1.3                          |
| Zfp280c                      | 37.0                                                                                | 3.8                        | 10                 | 31.0                        | 4.4                          |
| Zfp346                       | 16.0                                                                                | 0.4                        | 10                 | 15.0                        | 1.6                          |
| Zfp414                       | 15.0                                                                                | 0.3                        | 10                 | 16.8                        | 1.4                          |
| Zfp809                       | 16.9                                                                                | 0.5                        | 10                 | 17.3                        | 0.9                          |

Supplementary Table 4. Parameters included in machine learning algorithm. Related to Fig. 1, Supplementary Fig. 1 and Methods.

| <b>Parameters included in machine learning algorithm</b>                         | <b>Calculation / source</b>                                                         |
|----------------------------------------------------------------------------------|-------------------------------------------------------------------------------------|
| Charge of DBD domain                                                             | Number of positively charged AA (DBD)-number of negatively charged AA(DBD)          |
| Number of positively charged AA                                                  | protr (Xiao et al., 2015)                                                           |
| Number of negatively charged AA                                                  | protr (Xiao et al., 2015)                                                           |
| Number of neutral charged AA                                                     | protr (Xiao et al., 2015)                                                           |
| Length of the protein                                                            | Number of nucleotides                                                               |
| Charge of protein                                                                | Number of positively charged AA (protein)-number of negatively charged AA (protein) |
| Difference of high minus low polar AA                                            | protr (Xiao et al., 2015)                                                           |
| Fraction of AA with high minus fraction of low VDW interactions                  | protr (Xiao et al., 2015)                                                           |
| Difference of AA with high minus low VDW interactions                            | Total VDW fraction*Length                                                           |
| Number of DBD                                                                    | Number of domains found                                                             |
| Absolute charge of DBD domain per number of DBD                                  | DBDCharge/DomainNbr                                                                 |
| Fraction of phosphorylable AA (S, T, Y)                                          | protr (Xiao et al., 2015)                                                           |
| Fraction of methylable AA (K, R)                                                 | protr (Xiao et al., 2015)                                                           |
| Dispersion of positive charges                                                   | Index of dispersion of positive charges in the protein (variance/mean)              |
| Fraction of AA with a tendency to form helix structures                          | protr (Xiao et al., 2015)                                                           |
| Fraction of AA with a tendency to form strand structures                         | protr (Xiao et al., 2015)                                                           |
| Fraction of AA with a tendency to form coil structures                           | protr (Xiao et al., 2015)                                                           |
| Fraction of positive AA (K, R, H)                                                | Lee et al., 2009                                                                    |
| Fraction of aromatic AA (F, W, Y, H)                                             | Lee et al., 2009                                                                    |
| Fraction of polar AA (R, K, E, D, Q, N)                                          | Lee et al., 2009                                                                    |
| Fraction of hydrophobic AA (C, L, V, I, M, F, W)                                 | Lee et al., 2009                                                                    |
| Fraction of aliphatic AA (A, I, L, V)                                            | Lee et al., 2009                                                                    |
| Fraction of tiny AA (A, G)                                                       | Lee et al., 2009                                                                    |
| Fraction of bulky AA (F, H, R, W, Y)                                             | Lee et al., 2009                                                                    |
| Fraction of small AA (A, G, S, T)                                                | Lee et al., 2009                                                                    |
| Sum of gravy coefficient                                                         | Lee et al., 2009                                                                    |
| Number of continuous changes from positively charged AA to positively charged AA | Lee et al., 2009                                                                    |
| Number of continuous changes from uncharged AA to uncharged AA                   | Lee et al., 2009                                                                    |
| Number of continuous changes from negatively charged AA to negatively charged AA | Lee et al., 2009                                                                    |
| Number of positively charged AA clusters                                         | Sum of clusters of more than 2 consecutive positively charged AA                    |

|                                              |                                                                      |
|----------------------------------------------|----------------------------------------------------------------------|
| Number of uncharged AA clusters              | Sum of clusters of more than 2 consecutive uncharged AA              |
| Number of negatively charged AA clusters     | Sum of clusters of more than 2 consecutive negatively charged AA     |
| Fraction of disordered domain in the protein | Sum of ANCHOR scores / Length of the protein (Dosztnyi et al., 2009) |
| Number of AA in disordered domains           | Sum of ANCHOR scores (Dosztnyi et al., 2009)                         |
| DBD bZIP                                     | UNIPROT database                                                     |
| DBD bHLH                                     | UNIPROT database                                                     |
| DBD C2H2 zinc finger                         | UNIPROT database                                                     |
| DBD HMG                                      | UNIPROT database                                                     |
| DBD Nuclear receptors with C4 zinc fingers   | UNIPROT database                                                     |
| DBD T Box                                    | UNIPROT database                                                     |
| DBD C2HC zinc finger                         | UNIPROT database                                                     |
| DBD SMAD NF1 DBD                             | UNIPROT database                                                     |
| DBD DM type intertwined zinc finger          | UNIPROT database                                                     |
| DBD Homeo domain                             | UNIPROT database                                                     |
| DBD Tryptophan cluster                       | UNIPROT database                                                     |
| DBD C3H zinc finger                          | UNIPROT database                                                     |
| DBD TEA domain                               | UNIPROT database                                                     |
| DBD Fork head winged helix                   | UNIPROT database                                                     |
| DBD RHR                                      | UNIPROT database                                                     |
| DBD Heteromeric CCAAT binding                | UNIPROT database                                                     |
| DBD Other C4 zinc finger type                | UNIPROT database                                                     |
| DBD GCM domain                               | UNIPROT database                                                     |
| DBD ARID domain                              | UNIPROT database                                                     |
| DBD Grainyhead domain                        | UNIPROT database                                                     |
| DBD MADS box                                 | UNIPROT database                                                     |
| DBD Cold shock domain                        | UNIPROT database                                                     |
| DBD CXXC zinc finger                         | UNIPROT database                                                     |
| DBD C2CH THAP type zinc finger               | UNIPROT database                                                     |

Supplementary Table 5. Correlation between Hoechst and YPet signals in the whole cell, in heterochromatin, DNA-rich, and DNA-poor regions. Related to Fig. 2.

| Legend                            | Description                                                                                         |
|-----------------------------------|-----------------------------------------------------------------------------------------------------|
| <b>Transcription Factor</b>       | Name of the transcription factor                                                                    |
| <b>Pixel_Corr_HoechstYpet</b>     | Pixel by pixel correlation between Hoechst and YPet signals (whole cell)                            |
| <b>SEM_Pixel_Corr_HoechstYpet</b> | Standard error of the mean for the pixel by pixel correlation between Hoechst and YPet signals      |
| <b>Heterochromatin</b>            | Correlation between Hoechst and YPet signals in heterochromatin                                     |
| <b>SEM_Heterochromatin</b>        | Standard error of the mean for the correlation between Hoechst and YPet signals in heterochromatin  |
| <b>DNA-rich</b>                   | Correlation between Hoechst and YPet signals in DNA-rich regions                                    |
| <b>SEM_DNA-rich</b>               | Standard error of the mean for the correlation between Hoechst and YPet signals in DNA-rich regions |
| <b>DNA-poor</b>                   | Correlation between Hoechst and YPet signals in DNA-poor regions                                    |
| <b>SEM_DNA-poor</b>               | Standard error of the mean for the correlation between Hoechst and YPet signals in DNA-poor regions |

| Transcription Factor | Pixel_Corr_HoechstYpet | SEM_Pixel_Corr_HoechstYpet | Heterochromatin | SEM_Heterochromatin | DNA-rich | SEM_DNA-rich | DNA-poor | SEM_DNA-poor |
|----------------------|------------------------|----------------------------|-----------------|---------------------|----------|--------------|----------|--------------|
| Atf3                 | 0.56                   | 0.06                       | 0.17            | 0.02                | 0.27     | 0.01         | 0.56     | 0.04         |
| Bhlhb8               | 0.76                   | 0.02                       | 0.19            | 0.01                | 0.34     | 0.01         | 0.47     | 0.01         |
| Brachyury            | 0.36                   | 0.05                       | 0.08            | 0.01                | 0.34     | 0.01         | 0.58     | 0.02         |
| CDX2                 | 0.39                   | 0.06                       | 0.05            | 0.00                | 0.39     | 0.01         | 0.57     | 0.02         |
| Dlx1                 | 0.53                   | 0.04                       | 0.12            | 0.00                | 0.37     | 0.01         | 0.51     | 0.03         |
| Dlx6                 | 0.70                   | 0.02                       | 0.20            | 0.01                | 0.34     | 0.00         | 0.46     | 0.01         |
| Duxbl                | 0.84                   | 0.02                       | 0.28            | 0.01                | 0.30     | 0.01         | 0.42     | 0.02         |
| Ebf1                 | 0.35                   | 0.04                       | 0.05            | 0.00                | 0.38     | 0.01         | 0.58     | 0.02         |
| Foxa1                | 0.16                   | 0.08                       | 0.05            | 0.00                | 0.39     | 0.02         | 0.56     | 0.02         |
| Gata5                | 0.30                   | 0.06                       | 0.07            | 0.00                | 0.31     | 0.01         | 0.62     | 0.04         |
| Hes3                 | 0.36                   | 0.06                       | 0.07            | 0.01                | 0.27     | 0.01         | 0.66     | 0.03         |
| Hlf                  | 0.13                   | 0.07                       | 0.05            | 0.01                | 0.31     | 0.01         | 0.65     | 0.02         |
| Hmga2                | 0.77                   | 0.02                       | 0.19            | 0.00                | 0.27     | 0.00         | 0.54     | 0.03         |
| Hmgb2                | 0.80                   | 0.02                       | 0.17            | 0.01                | 0.29     | 0.00         | 0.54     | 0.02         |
| Hmgn1                | 0.71                   | 0.02                       | 0.14            | 0.01                | 0.36     | 0.00         | 0.50     | 0.01         |
| Hoxd10               | 0.39                   | 0.05                       | 0.11            | 0.02                | 0.31     | 0.01         | 0.58     | 0.03         |
| Mafg                 | 0.57                   | 0.05                       | 0.21            | 0.01                | 0.33     | 0.00         | 0.46     | 0.02         |
| Mafk                 | 0.62                   | 0.06                       | 0.24            | 0.01                | 0.33     | 0.01         | 0.43     | 0.02         |
| Max                  | 0.61                   | 0.05                       | 0.08            | 0.01                | 0.40     | 0.00         | 0.52     | 0.02         |
| Nanog                | 0.33                   | 0.05                       | 0.09            | 0.01                | 0.32     | 0.01         | 0.59     | 0.02         |
| Nr1i2                | 0.18                   | 0.04                       | 0.07            | 0.01                | 0.30     | 0.01         | 0.63     | 0.01         |
| Pax2                 | 0.04                   | 0.03                       | 0.07            | 0.01                | 0.32     | 0.01         | 0.61     | 0.02         |
| Pias4                | 0.53                   | 0.04                       | 0.12            | 0.01                | 0.38     | 0.01         | 0.51     | 0.02         |
| Pou1f1               | 0.33                   | 0.07                       | 0.12            | 0.01                | 0.36     | 0.00         | 0.52     | 0.02         |
| Oct4                 | 0.61                   | 0.03                       | 0.15            | 0.01                | 0.35     | 0.00         | 0.50     | 0.03         |
| Prr3                 | 0.32                   | 0.07                       | 0.05            | 0.01                | 0.31     | 0.01         | 0.63     | 0.04         |
| Rhox11               | 0.37                   | 0.08                       | 0.08            | 0.00                | 0.31     | 0.01         | 0.61     | 0.03         |
| Six6                 | 0.39                   | 0.06                       | 0.12            | 0.01                | 0.34     | 0.01         | 0.54     | 0.01         |
| Sox15                | 0.49                   | 0.04                       | 0.10            | 0.01                | 0.39     | 0.01         | 0.51     | 0.02         |
| Sox2                 | 0.35                   | 0.05                       | 0.07            | 0.00                | 0.38     | 0.00         | 0.55     | 0.02         |
| Srcap                | 0.71                   | 0.03                       | 0.16            | 0.01                | 0.33     | 0.01         | 0.52     | 0.01         |
| Tcfec                | 0.41                   | 0.06                       | 0.14            | 0.06                | 0.30     | 0.01         | 0.56     | 0.06         |
| Tead1                | 0.86                   | 0.01                       | 0.26            | 0.02                | 0.33     | 0.00         | 0.41     | 0.02         |
| Thap4                | 0.37                   | 0.05                       | 0.05            | 0.00                | 0.37     | 0.02         | 0.58     | 0.02         |
| Tox3                 | 0.36                   | 0.06                       | 0.04            | 0.00                | 0.31     | 0.01         | 0.65     | 0.04         |
| Zfp131               | 0.26                   | 0.07                       | 0.05            | 0.00                | 0.27     | 0.01         | 0.68     | 0.05         |
| Zfp319               | 0.34                   | 0.05                       | 0.09            | 0.01                | 0.36     | 0.02         | 0.56     | 0.02         |
| Zmat2                | 0.43                   | 0.07                       | 0.08            | 0.00                | 0.23     | 0.01         | 0.68     | 0.03         |



Supplementary Table 6. Half-times of FRAP recovery in mitosis and interphase cells and predicted molecular weight. Related to Fig. 3 and Supplementary Fig. 2.

| <b>Legend</b>                             | <b>Description</b>                                                            |
|-------------------------------------------|-------------------------------------------------------------------------------|
| <b>Transcription Factor</b>               | Name of the transcription factor                                              |
| <b>FRAP t1/2 recovery time inter.</b>     | Interphase half time of fluorescence recovery                                 |
| <b>SEM FRAP t1/2 recovery time inter.</b> | Standard error of the interphase half time of fluorescence recovery           |
| <b>FRAP t1/2 recovery time meta.</b>      | Mitotic half time of fluorescence recovery                                    |
| <b>SEM FRAP t1/2 recovery time meta.</b>  | Standard error of the mitotic half time of fluorescence recovery              |
| <b>FRAP immobile fraction inter.</b>      | Interphase FRAP immobile fraction                                             |
| <b>SEM FRAP immobile fraction inter.</b>  | Standard error of the interphase FRAP immobile fraction                       |
| <b>FRAP immobile fraction mitosis</b>     | Mitotic FRAP immobile fraction                                                |
| <b>SEM FRAP immobile fraction mitosis</b> | Standard error of the mitotic FRAP immobile fraction                          |
| <b>Predicted Molecular Weight [kDa]</b>   | Predicted Molecular Weight, based on protein and YPet tag amino acid sequence |

| <b>Transcription Factor</b> | <b>FRAP t1/2 recovery time inter. [s]</b> | <b>SEM FRAP t1/2 recovery time inter.</b> | <b>FRAP t1/2 recovery time meta. [s]</b> | <b>SEM FRAP t1/2 recovery time meta.</b> | <b>FRAP immobile fraction inter.</b> | <b>SEM FRAP immobile fraction inter.</b> | <b>FRAP immobile fraction mitosis</b> | <b>SEM FRAP immobile fraction mitosis</b> | <b>Predicted Molecular Weight [kDa]</b> |
|-----------------------------|-------------------------------------------|-------------------------------------------|------------------------------------------|------------------------------------------|--------------------------------------|------------------------------------------|---------------------------------------|-------------------------------------------|-----------------------------------------|
| BHLHB8                      | 10.82                                     | 1.03                                      | 13.48                                    | 1.66                                     | 0.08                                 | 0.03                                     | 0.09                                  | 0.02                                      | 51.78                                   |
| BRACHYURY                   | 4.20                                      | 0.45                                      | NA                                       | NA                                       | 0.09                                 | 0.03                                     | NA                                    | NA                                        | 77.08                                   |
| CDX2                        | 14.03                                     | 1.09                                      | 7.78                                     | 0.93                                     | 0.21                                 | 0.02                                     | 0.18                                  | 0.03                                      | 63.11                                   |
| DLX6                        | 6.91                                      | 0.75                                      | 13.25                                    | 1.71                                     | 0.10                                 | 0.03                                     | 0.05                                  | 0.01                                      | 49.22                                   |
| FOXA1                       | 6.47                                      | 0.59                                      | 3.87                                     | 0.41                                     | 0.13                                 | 0.02                                     | 0.11                                  | 0.04                                      | 78.49                                   |
| HMGA2                       | 9.18                                      | 1.23                                      | 10.59                                    | 5.57                                     | 0.11                                 | 0.04                                     | 0.12                                  | 0.05                                      | 41.45                                   |
| HMGB2                       | 7.87                                      | 1.61                                      | 1.21                                     | 0.11                                     | 0.08                                 | 0.03                                     | 0.08                                  | 0.03                                      | 53.80                                   |
| HMGN1                       | 4.57                                      | 0.58                                      | 5.40                                     | 0.64                                     | 0.10                                 | 0.01                                     | 0.04                                  | 0.02                                      | 39.78                                   |
| HOXD10                      | 3.50                                      | 0.92                                      | 1.71                                     | 0.52                                     | 0.03                                 | 0.01                                     | 0.05                                  | 0.03                                      | 67.96                                   |
| MAFK                        | 17.95                                     | 3.10                                      | 19.33                                    | 4.34                                     | 0.20                                 | 0.05                                     | 0.19                                  | 0.07                                      | 47.17                                   |
| MAX                         | 16.21                                     | 1.59                                      | 30.86                                    | 5.39                                     | 0.22                                 | 0.04                                     | 0.23                                  | 0.07                                      | 46.80                                   |
| NANOG                       | 3.55                                      | 0.40                                      | NA                                       | NA                                       | 0.03                                 | 0.01                                     | NA                                    | NA                                        | 63.88                                   |
| POU5F1                      | 5.33                                      | 0.47                                      | 4.70                                     | 1.93                                     | 0.08                                 | 0.02                                     | 0.08                                  | 0.02                                      | 67.85                                   |
| SOX15                       | 2.92                                      | 0.37                                      | 2.03                                     | 0.22                                     | 0.04                                 | 0.01                                     | 0.02                                  | 0.01                                      | 54.95                                   |
| SOX2                        | 7.68                                      | 0.80                                      | 9.97                                     | 0.60                                     | 0.12                                 | 0.03                                     | 0.19                                  | 0.04                                      | 64.04                                   |
| TEAD1                       | 8.51                                      | 1.11                                      | 4.60                                     | 0.80                                     | 0.10                                 | 0.04                                     | 0.07                                  | 0.03                                      | 76.43                                   |
| THAP4                       | 2.29                                      | 0.53                                      | 2.80                                     | 0.47                                     | 0.10                                 | 0.06                                     | 0.09                                  | 0.03                                      | 92.21                                   |
| ZFP131                      | 4.45                                      | 0.58                                      | NA                                       | NA                                       | 0.10                                 | 0.03                                     | NA                                    | NA                                        | 96.54                                   |

Supplementary Table 7. Pseudo ON-rates and relative residence times per transcription factor. Related to Fig. 3, Fig. 4 and Supplementary Fig. 3.

| <b>Legend</b>                                   |                                                        | <b>Description</b>                                   |                                                 |                                                    |                                               |
|-------------------------------------------------|--------------------------------------------------------|------------------------------------------------------|-------------------------------------------------|----------------------------------------------------|-----------------------------------------------|
| <b>Transcription Factor</b>                     |                                                        | Name of the transcription factor                     |                                                 |                                                    |                                               |
| <b>Heterochromatin <math>\Psi</math>ON-rate</b> |                                                        | Pseudo on-rate in heterochromatin                    |                                                 |                                                    |                                               |
| <b>DNA-rich <math>\Psi</math>ON-rate</b>        |                                                        | Pseudo on-rate in DNA-rich regions                   |                                                 |                                                    |                                               |
| <b>DNA-poor <math>\Psi</math>ON-rate</b>        |                                                        | Pseudo on-rate in DNA-poor regions                   |                                                 |                                                    |                                               |
| <b>Sum <math>\Psi</math>ON-rate (total)</b>     |                                                        | Sum of pseudo on-rate over the whole nucleus         |                                                 |                                                    |                                               |
| <b>Average residence times (Total)</b>          |                                                        | Relative residence time of each transcription factor |                                                 |                                                    |                                               |
| <b>Transcription Factor</b>                     | <b>Heterochromatin <math>\Psi</math>ON-rate [A.U.]</b> | <b>DNA-rich <math>\Psi</math>ON-rate [A.U.]</b>      | <b>DNA-poor <math>\Psi</math>ON-rate [A.U.]</b> | <b>Sum <math>\Psi</math>ON-rate (total) [A.U.]</b> | <b>Average residence times (Total) [A.U.]</b> |
| Foxa1                                           | 1.32E-05                                               | 1.43E-05                                             | 1.46E-05                                        | 4.21E-05                                           | 6.5047                                        |
| Nanog                                           | 1.11E-05                                               | 1.57E-05                                             | 1.96E-05                                        | 4.64E-05                                           | 8.83455                                       |
| Sox15                                           | 1.57E-05                                               | 2.01E-05                                             | 1.70E-05                                        | 5.27E-05                                           | 7.70267                                       |
| Hoxd10                                          | 1.82E-05                                               | 1.98E-05                                             | 1.98E-05                                        | 5.79E-05                                           | 7.84462                                       |
| Tead1                                           | 1.87E-05                                               | 2.29E-05                                             | 1.68E-05                                        | 5.85E-05                                           | 7.84896                                       |
| Cdx2                                            | 1.42E-05                                               | 2.66E-05                                             | 2.04E-05                                        | 6.12E-05                                           | 9.16559                                       |
| Dlx6                                            | 2.59E-05                                               | 2.18E-05                                             | 1.96E-05                                        | 6.73E-05                                           | 7.98                                          |
| Sox2                                            | 2.58E-05                                               | 2.97E-05                                             | 2.17E-05                                        | 7.71E-05                                           | 7.81308                                       |
| Bhlhb8                                          | 4.59E-05                                               | 4.16E-05                                             | 2.22E-05                                        | 0.00011                                            | 7.015                                         |

Supplementary Table 8. Number of peaks called, fraction of reads in peaks and fraction of occupied motifs in close and open genome per TF. Related to Fig. 4, Fig. 5, Supplementary Fig. 3, Supplementary Fig. 4 and Supplementary Fig. 5.

| Legend                       | Description                                                                                               |  |  |  |  |  |  |  |  |  |  |  |
|------------------------------|-----------------------------------------------------------------------------------------------------------|--|--|--|--|--|--|--|--|--|--|--|
| Transcription Factor         | Name of the transcription factor                                                                          |  |  |  |  |  |  |  |  |  |  |  |
| HA_intensity                 | Expression levels assessed by quantitative analysis of immunofluorescence images normalized to background |  |  |  |  |  |  |  |  |  |  |  |
| MACS2                        | Number of peaks called with MACS2                                                                         |  |  |  |  |  |  |  |  |  |  |  |
| MACS2_q0.01                  | Number of peaks called with MACS2 (q<0.01)                                                                |  |  |  |  |  |  |  |  |  |  |  |
| HOMER                        | Number of peaks called with HOMER                                                                         |  |  |  |  |  |  |  |  |  |  |  |
| MACS2_downsampled            | Number of peaks called with MACS2 (downsampling to 10 <sup>7</sup> total reads for each TF)               |  |  |  |  |  |  |  |  |  |  |  |
| FRIP [%]                     | Fraction of reads in peaks                                                                                |  |  |  |  |  |  |  |  |  |  |  |
| FOM_all                      | Fraction of occupied top motifs                                                                           |  |  |  |  |  |  |  |  |  |  |  |
| FOM_open                     | Fraction of occupied top motifs in open genome                                                            |  |  |  |  |  |  |  |  |  |  |  |
| FOM_closed                   | Fraction of occupied top motifs in closed genome                                                          |  |  |  |  |  |  |  |  |  |  |  |
| FOM_published                | Fraction of occupied published motifs                                                                     |  |  |  |  |  |  |  |  |  |  |  |
| FOM_published_open           | Fraction of occupied published motifs in open genome                                                      |  |  |  |  |  |  |  |  |  |  |  |
| Fraction_peaks_in_closed [%] | Fraction of ChIP peaks in closed chromatin                                                                |  |  |  |  |  |  |  |  |  |  |  |

  

| Transcription Factor | HA_intensity [A.U.] | MACS2 | MACS2_q0.01 | HOMER | MACS2_downsampled | FRIP [%] | FOM_all [%] | FOM_open [%] | FOM_closed [%] | FOM_published [%] | FOM_published_open [%] | Fraction_peaks_in_closed [%] |
|----------------------|---------------------|-------|-------------|-------|-------------------|----------|-------------|--------------|----------------|-------------------|------------------------|------------------------------|
| BHLHB8_1             | 7.96                | 46842 | 39556       | 8403  | 5792              | 12.40    | 1.97        | 33.59        | 1.29           | NA                | NA                     | 41.32                        |
| BHLHB8_2             | 7.96                | 61991 | 39588       | 15722 | 10359             | 21.49    | 3.50        | 22.73        | 2.17           | NA                | NA                     | 62.48                        |
| BRACHYURY            | 3.27                | 720   | 456         | 25    | 2                 | 0.10     | 0.05        | 0.68         | 0.26           | 0.02              | 2.43                   | 22.78                        |
| CDX2                 | 10.85               | 25278 | 18012       | 2793  | 1079              | 4.21     | 1.81        | 6.97         | 1.98           | 1.12              | 30.62                  | 83.84                        |
| DLX1                 | 6.56                | 20124 | 14475       | 1543  | 452               | 3.42     | 1.36        | 23.22        | 0.18           | 0.19              | 35.97                  | 19.78                        |
| DLX6                 | 3.05                | 20983 | 16007       | 4033  | 2034              | 4.98     | 1.55        | 25.34        | 0.14           | 0.23              | 35.11                  | 21.11                        |
| DUXBL                | 4.80                | 24318 | 17292       | 8328  | 4430              | 5.54     | 7.90        | 8.21         | 7.30           | 7.90              | 65.85                  | 78.16                        |
| EBF1                 | 3.57                | 7669  | 6421        | 2894  | 1205              | 2.37     | 1.08        | 32.15        | 0.48           | 1.08              | 41.75                  | 20.43                        |
| FOXA1_1              | 3.19                | 6033  | 4750        | 1406  | 417               | 1.23     | 0.18        | 20.56        | 0.10           | NA                | NA                     | 26.14                        |
| FOXA1_2              | 3.19                | 1099  | 783         | 237   | 30                | 0.21     | 0.06        | 6.28         | 0.01           | NA                | NA                     | 26.48                        |
| FOXA1_RR             | 6.31                | 151   | 101         | 17    | 6                 | 0.03     | 0.01        | 1.58         | 0.02           | 0.00              | 0.38                   | 25.17                        |
| FOXA1_SW             | 5.82                | 147   | 93          | 4     | 3                 | 0.03     | 0.02        | 6.56         | 0.03           | NA                | NA                     | 38.78                        |
| HLF                  | 1.91                | 2635  | 1934        | 288   | 45                | 0.38     | 0.12        | 19.05        | 0.09           | 0.06              | 5.97                   | 26.76                        |
| MAX                  | 5.29                | 3836  | 3070        | 2075  | 655               | 1.21     | 0.31        | 16.84        | 0.15           | NA                | NA                     | 27.22                        |
| NANOG                | 3.16                | 396   | 269         | 6     | 1                 | 0.05     | 0.02        | 0.79         | 0.02           | NA                | NA                     | 32.58                        |
| POU5F1_1             | 2.82                | 95    | 68          | 24    | 4                 | 0.02     | 0.01        | 1.23         | 0.01           | NA                | NA                     | 17.89                        |
| POU5F1_2             | 2.82                | 52    | 33          | 0     | 1                 | 0.01     | 0.01        | 0.58         | 0.34           | NA                | NA                     | 15.38                        |
| PRR3                 | 3.46                | 62    | 41          | 1     | 2                 | 0.02     | 0.11        | 7.69         | 0.18           | NA                | NA                     | 32.26                        |
| RHOX11               | 1.79                | 4579  | 2833        | 162   | 28                | 0.62     | 2.66        | 11.18        | 0.08           | 0.05              | 3.49                   | 35.60                        |
| SIX6                 | 3.07                | 6075  | 4727        | 970   | 343               | 1.16     | 0.37        | 6.53         | 1.54           | 0.07              | 11.61                  | 21.23                        |
| SOX15                | 5.03                | 5002  | 3935        | 1360  | 637               | 1.26     | 0.34        | 6.28         | 0.02           | 0.10              | 9.81                   | 14.25                        |
| SOX2_1               | 3.86                | 25049 | 21918       | 7236  | 5223              | 7.99     | 1.52        | 30.01        | 0.15           | NA                | NA                     | 26.14                        |
| SOX2_2               | 3.86                | 5692  | 4628        | 1844  | 849               | 1.47     | 0.40        | 7.04         | 0.05           | NA                | NA                     | 18.10                        |
| TEAD1                | 3.79                | 14959 | 10606       | 27424 | 10903             | 9.53     | NA          | 69.06        | 11.02          | NA                | NA                     | 65.49                        |
| THAP4                | 3.31                | 58    | 40          | 9     | 5                 | 0.02     | 1.74        | 17.65        | 0.11           | NA                | NA                     | 27.59                        |
| TOX3                 | 2.28                | 1286  | 1026        | 416   | 166               | 0.43     | 0.04        | 0.69         | 0.14           | NA                | NA                     | 8.40                         |
| ZFP319               | 2.06                | 14645 | 11914       | 7825  | 4958              | 7.96     | NA          | 42.20        | 5.72           | NA                | NA                     | 78.34                        |

Supplementary Table 9. Motifs enriched in ChIP-seq peaks for each TF. Related to Fig. 4, Supplementary Fig. 4, Supplementary Fig. 5 and methods.

| Legend                      | Description                                                                                      |
|-----------------------------|--------------------------------------------------------------------------------------------------|
| <b>Transcription Factor</b> | Name of the transcription factor                                                                 |
| <b>Motif_all_peaks</b>      | Most highly enriched de novo motif in ChIP-seq peaks                                             |
| <b>Motif_open_peaks</b>     | Most highly enriched de novo motif in ChIP-seq peaks in accessible regions                       |
| <b>Motif_closed_peaks</b>   | Most highly enriched de novo motif in ChIP-seq peaks in non-accessible regions                   |
| <b>Published_motif</b>      | Enriched published motif for the corresponding transcription factor or a closely related protein |

| Transcription Factor | Motif_all_peaks                                                       | Motif_open_peaks                                            | Motif_closed_peaks                                           | Published_motif                                                  |
|----------------------|-----------------------------------------------------------------------|-------------------------------------------------------------|--------------------------------------------------------------|------------------------------------------------------------------|
| BHLHB8_1             | Atoh1(bHLH)/Cerebellum-Atoh1-ChIP-Seq(GSE22111)/Homer(0.946)          | Atf3(bZIP)/GBM-ATF3-ChIP-Seq(GSE33912)/Homer(0.992)         | MA0091.1_TAL1::TCF3/Jaspar(0.947)                            | Olig2(bHLH)/Neuron-Olig2-ChIP-Seq(GSE30882)/Homer                |
| BHLHB8_2             | MA0091.1_TAL1::TCF3/Jaspar(0.940)                                     | AP-1(bZIP)/ThioMac-PU.1-ChIP-Seq(GSE21512)/Homer(0.995)     | Atoh1(bHLH)/Cerebellum-Atoh1-ChIP-Seq(GSE22111)/Homer(0.967) | Olig2(bHLH)/Neuron-Olig2-ChIP-Seq(GSE30882)/Homer                |
| BRACHYURY            | Fra1(bZIP)/ThioMac-PU.1-ChIP-Seq(GSE21512)/Homer(0.987)               | Fra1(bZIP)/BT549-Fra1-ChIP-Seq(GSE46166)/Homer(0.984)       | PB0117.1_Eomes_2/Jaspar(0.742)                               | Brachyury(T-box)/Mesoendoderm-Brachyury-ChIP-exo(GSE54963)/Homer |
| CDX2                 | caudal(Homeobox)/Drosophila-Embryos-ChIP-Chip(modEncode)/Homer(0.959) | Atf3(bZIP)/GBM-ATF3-ChIP-Seq(GSE33912)/Homer(0.995)         | MA0465.1_CDX2/Jaspar(0.958)                                  | Cdx2(Homeobox)/mES-Cdx2-ChIP-Seq(GSE14586)/Homer                 |
| DLX1                 | Atf3(bZIP)/GBM-ATF3-ChIP-Seq(GSE33912)/Homer(0.991)                   | Fra1(bZIP)/BT549-Fra1-ChIP-Seq(GSE46166)/Homer(0.994)       | MA0091.1_TAL1::TCF3/Jaspar(0.934)                            | PH020.1                                                          |
| DLX6                 | AP-1(bZIP)/ThioMac-PU.1-ChIP-Seq(GSE21512)/Homer(0.992)               | Fra1(bZIP)/BT549-Fra1-ChIP-Seq(GSE46166)/Homer(0.993)       | RUNX(Runt)/HPC7-Runx1-ChIP-Seq(GSE22178)/Homer(0.971)        | MA0882.1                                                         |
| DUXBL                | MA0468.1_DUX4/Jaspar(0.962)                                           | Fra1(bZIP)/BT549-Fra1-ChIP-Seq(GSE46166)/Homer(0.981)       | MA0468.1_DUX4/Jaspar(0.903)                                  | MA0468.1_DUX4/Jaspar(0.962)                                      |
| EBF1                 | EBF(EBF)/proBcell-EBF-ChIP-Seq(GSE21978)/Homer(0.994)                 | EBF(EBF)/proBcell-EBF-ChIP-Seq(GSE21978)/Homer(0.969)       | EBF(EBF)/proBcell-EBF-ChIP-Seq(GSE21978)/Homer(0.989)        | EBF(EBF)/proBcell-EBF-ChIP-Seq(GSE21978)/Homer(0.994)            |
| FOXA1_1              | Foxa2(Forkhead)/Liver-Foxa2-ChIP-Seq(GSE25694)/Homer(0.972)           | MA0047.2_Foxa2/Jaspar(0.974)                                | MA0047.2_Foxa2/Jaspar(0.974)                                 | Foxa2(Forkhead)/Liver-Foxa2-ChIP-Seq(GSE25694)/Homer             |
| FOXA1_2              | MA0047.2_Foxa2/Jaspar(0.983)                                          | Foxa2(Forkhead)/Liver-Foxa2-ChIP-Seq(GSE25694)/Homer(0.975) | Foxa2(Forkhead)/Liver-Foxa2-ChIP-Seq(GSE25694)/Homer(0.977)  | Foxa2(Forkhead)/Liver-Foxa2-ChIP-Seq(GSE25694)/Homer             |
| FOXA1_RR             | MA0031.1_FOXD1/Jaspar(0.885)                                          | MA0047.2_Foxa2/Jaspar(0.832)                                | vnd/dmmpmm(Noyes_hd)/fly(0.666)                              | Foxa2(Forkhead)/Liver-Foxa2-ChIP-Seq(GSE25694)/Homer             |
| FOXA1_SW             | SIP4/SIP4_SM/9-SIP4(Harison)/Yeast(0.761)                             | Deaf1(dmmpmm(Bigfoot))/fly(0.668)                           | GAGA-repeat/Arabidopsis-Promoters/Homer(0.712)               | NA                                                               |
| HLF                  | MF0006.1_bZIP_cEBP-like_subclass/Jaspar(0.903)                        | MF0006.1_bZIP_cEBP-like_subclass/Jaspar(0.922)              | MA0025.1_NFIL3/Jaspar(0.905)                                 | MA0043.1                                                         |
| MAX                  | MA0047.2_Foxa2/Jaspar(0.982)                                          | MA0047.2_Foxa2/Jaspar(0.986)                                | MA0047.2_Foxa2/Jaspar(0.941)                                 | NA                                                               |
| NANOG                | RUNX-AML(Runt)/CD4+PolII-ChIP-Seq(Barski et al.)/Homer(0.964)         | RUNX2(Runt)/PCa-RUNX2-ChIP-Seq(GSE33889)/Homer(0.866)       | PRDM1(Zf)/Hela-PRDM1-ChIP-Seq(GSE31477)/Homer(0.669)         | NA                                                               |
| OCT4_1               | Pit1(Homeobox)/GCrat-Pit1-ChIP-Seq(GSE58009)/Homer(0.903)             | Pit1(Homeobox)/GCrat-Pit1-ChIP-Seq(GSE58009)/Homer(0.873)   | Eip74EF/dmmpmm(SeSiMCMC)/fly(0.615)                          | Oct4(POU.Homeobox)/mES-Oct4-ChIP-Seq(GSE11431)/Homer             |
| OCT4_2               | Srebp2(bHLH)/HepG2-Srebp2-ChIP-Seq(GSE31477)/Homer(0.790)             | MATA1(MacIsaac)/Yeast(0.629)                                | YDR026c/YDR026c_YPD/[I]/Harison)/Yeast(0.778)                | Oct4(POU.Homeobox)/mES-Oct4-ChIP-Seq(GSE11431)/Homer             |
| PRR3                 | Srebp1a(bHLH)/HepG2-Srebp1a-ChIP-Seq(GSE31477)/Homer(0.638)           | HAP2(Literature)(Harison)/Yeast(0.640)                      | STAT6(Stat)/Macrophage-Stat6-ChIP-Seq(GSE38377)/Homer(0.750) | NA                                                               |
| RHOX11               | GFY(7)/Promoter/Homer(0.953)                                          | EIk4(ETS)/Hela-EIk4-ChIP-Seq(GSE31477)/Homer(0.985)         | ovo/dmmpmm(Down)/fly(0.702)                                  | PH0158.1_Rhox11_2/Jaspar(0.834)                                  |
| SIK5                 | Fos2(bZIP)/3T3L1-Fos2-ChIP-Seq(GSE56872)/Homer(0.990)                 | Fra1(bZIP)/BT549-Fra1-ChIP-Seq(GSE46166)/Homer(0.993)       | MA0426.1_YHP_1/Jaspar(0.716)                                 | PB0059.1                                                         |
| SOX16                | Fra1(bZIP)/BT549-Fra1-ChIP-Seq(GSE46166)/Homer(0.990)                 | Fra1(bZIP)/BT549-Fra1-ChIP-Seq(GSE46166)/Homer(0.988)       | Sox3(HMG)/NPC-Sox3-ChIP-Seq(GSE11431)/Homer(0.956)           | Sox3(HMG)/NPC-Sox3-ChIP-Seq(GSE33059)/Homer                      |
| SOX2_1               | Atf3(bZIP)/GBM-ATF3-ChIP-Seq(GSE33912)/Homer(0.992)                   | Atf3(bZIP)/GBM-ATF3-ChIP-Seq(GSE33912)/Homer(0.991)         | Sox3(HMG)/NPC-Sox3-ChIP-Seq(GSE33059)/Homer(0.976)           | Sox3(HMG)/NPC-Sox3-ChIP-Seq(GSE33059)/Homer                      |
| SOX2_2               | Fra1(bZIP)/BT549-Fra1-ChIP-Seq(GSE46166)/Homer(0.993)                 | Fra1(bZIP)/BT549-Fra1-ChIP-Seq(GSE46166)/Homer(0.993)       | Sox3(HMG)/NPC-Sox3-ChIP-Seq(GSE33059)/Homer(0.966)           | Sox3(HMG)/NPC-Sox3-ChIP-Seq(GSE33059)/Homer                      |
| TEAD1                | SeqBias: CG-repeat(0.787)                                             | PHD1/PHD1_BUT908-SUT1(Harison)/Yeast(0.781)                 | PB0095.1_Zfp161_1/Jaspar(0.804)                              | NA                                                               |
| THAP4                | SPL14(SBP)/Arabidopsis italiana/AthaMap(0.776)                        | PB0086.1_Tcfap2b_1/Jaspar(0.747)                            | twi/dmmpmm(Papatsenko)/fly(0.741)                            | NA                                                               |
| TOX3                 | AP-1(bZIP)/ThioMac-PU.1-ChIP-Seq(GSE21512)/Homer(0.978)               | AP-1(bZIP)/ThioMac-PU.1-ChIP-Seq(GSE21512)/Homer(0.969)     | br-Z1/dmmpmm(Bigfoot)/fly(0.662)                             | NA                                                               |
| ZFP319               | SeqBias: GA-repeat(0.900)                                             | Tf1/dmmpmm(Down)/fly(0.905)                                 | Tf1/dmmpmm(Down)/fly(0.852)                                  | NA                                                               |

Supplementary Table 10. Number and fraction of TF ChIP-seq peaks and ATAC-seq peaks with changed chromatin accessibility per TF. Related to Fig. 5 and Supplementary Fig. 5.

| Legend                          | Description                                                     |
|---------------------------------|-----------------------------------------------------------------|
| <b>Transcription Factor</b>     | Name of the transcription factor                                |
| <b>nrpeaks_merged</b>           | Number of merged ChIP-seq peaks                                 |
| <b>TFsites_changed</b>          | Number of ChIP-seq peaks with changed chromatin accessibility   |
| <b>TFsites_up</b>               | Number of ChIP-seq peaks with increased chromatin accessibility |
| <b>TFsites_down</b>             | Number of ChIP-seq peaks with decreased chromatin accessibility |
| <b>TFsites_fraction_changed</b> | Fraction of TF peaks with changed accessibility                 |
| <b>TFsites_fraction_up</b>      | Fraction of TF peaks with increased accessibility               |
| <b>TFsites_fraction_down</b>    | Fraction of TF peaks with decreased accessibility               |
| <b>ATACsites_changed</b>        | Number of ATAC-seq peaks with changed chromatin accessibility   |
| <b>ATACsites_up</b>             | Number of ATAC-seq peaks with increased chromatin accessibility |
| <b>ATACsites_down</b>           | Number of ATAC-seq peaks with decreased chromatin accessibility |

| Transcription Factor | nrpeaks_merged | TFsites_changed | TFsites_up | TFsites_down | TFsites_fraction_changed [%] | TFsites_fraction_up [%] | TFsites_fraction_down [%] | ATACsites_changed | ATACsites_up | ATACsites_down |
|----------------------|----------------|-----------------|------------|--------------|------------------------------|-------------------------|---------------------------|-------------------|--------------|----------------|
| BHLHB8               | 82754          | 11              | 7          | 4            | 0.01                         | 0.01                    | 0.00                      | 7                 | 6            | 1              |
| BRACHYURY            | 708            | 1               | 1          | 0            | 0.14                         | 0.14                    | 0.00                      | 12                | 11           | 1              |
| CDX2                 | 25190          | 11652           | 11418      | 234          | 46.26                        | 45.33                   | 0.93                      | 26937             | 16162        | 10775          |
| DLX6                 | 20563          | 11              | 11         | 0            | 0.05                         | 0.05                    | 0.00                      | 22                | 18           | 4              |
| DUXBL                | 24265          | 303             | 7          | 296          | 1.25                         | 0.03                    | 1.22                      | 1280              | 315          | 965            |
| FOXA1                | 6201           | 783             | 726        | 57           | 12.63                        | 11.71                   | 0.92                      | 7913              | 5539         | 2374           |
| HLF                  | 2601           | 0               | 0          | 0            | 0.00                         | 0.00                    | 0.00                      | 2                 | 2            | 0              |
| NANOG                | 383            | 1               | 1          | 0            | 0.26                         | 0.26                    | 0.00                      | 5                 | 4            | 1              |
| POU5F1               | 116            | 0               | 0          | 0            | 0.00                         | 0.00                    | 0.00                      | 8                 | 8            | 0              |
| RHOX11               | 4533           | 14              | 4          | 10           | 0.31                         | 0.09                    | 0.22                      | 3374              | 2322         | 1052           |
| SIX6                 | 5976           | 94              | 1          | 93           | 1.57                         | 0.02                    | 1.56                      | 249               | 73           | 176            |
| SOX15                | 4934           | 2               | 2          | 0            | 0.04                         | 0.04                    | 0.00                      | 57                | 51           | 6              |
| SOX2                 | 25045          | 1849            | 1704       | 145          | 7.38                         | 6.80                    | 0.58                      | 7438              | 5549         | 1889           |

Supplementary Table 11. Primers used for PCR cloning

| Construct      | Primer name    | Sequence                                                                  |
|----------------|----------------|---------------------------------------------------------------------------|
| Gbx2 pENTR     | Gbx2-F         | 5'-ggggacaagttgtacaaaaaagcaggcaccatgagcgcagcgttcc-3'                      |
|                | Gbx2-R         | 5'-ggggaccactttgtacaagaaagctgggtcgggtcgggcctgctc-3'                       |
| Klf2 pENTR     | Klf2-F         | 5'-ggggacaagttgtacaaaaaagcaggcaccatggcgctcagcgcagc-3'                     |
|                | Klf2-R         | 5'-ggggaccactttgtacaagaaagctgggtccatgtgtcgcttcatgtgc-3'                   |
| Klf4 pENTR     | Klf4-F         | 5'-ggggacaagttgtacaaaaaagcaggcaccatgaggcagccacctgg-3'                     |
|                | Klf4-R         | 5'-ggggaccactttgtacaagaaagctgggtcaaagtgcccttcatgtgtaagg-3'                |
| Klf5 pENTR     | Klf5-F         | 5'-ggggacaagttgtacaaaaaagcaggcaccatgccacgcgggtg-3'                        |
|                | Klf5-R         | 5'-ggggaccactttgtacaagaaagctgggtcgttctggtggcgcttcat-3'                    |
| Nanog pENTR    | Nanog-F        | 5'-ggggacaagttgtacaaaaaagcaggcaccatgagtgtgggtcttctgg-3'                   |
|                | Nanog-R        | 5'-ggggaccactttgtacaagaaagctgggtctatttcacctggtggagtcaca-3'                |
| sox17 pENTR    | sox17-F        | 5'-ggggacaagttgtacaaaaaagcaggcaccatgagcagcccggatg-3'                      |
|                | sox17-R        | 5'-ggggaccactttgtacaagaaagctgggtcaatgtcgggtagttgcaat-3'                   |
| Tcf3 pENTR     | Tcf3-F         | 5'-ggggacaagttgtacaaaaaagcaggcaccatgcccagctcgggtg-3'                      |
|                | Tcf3-R         | 5'-ggggaccactttgtacaagaaagctgggtcgtgggcagacttggtagcc-3'                   |
| FoxA1_SW       | FoxA1SWmut-F   | 5'-ccaggcaagggcgctacgcgacgctgcaccc-3'                                     |
| FoxA1_RR       | FoxA1RRmut-F   | 5'-cggctgctacttgcgcgcccaaaaggccttcaagtgtgagaag-3'                         |
| YPet-NLS (all) | YPet-NLS-F     | 5'-ttgtcgacatggtgagcaaaggcgaa-3'                                          |
| NLS(RKRKR)     | YPet-RKRKR-R   | 5'-ttcatatgttatctcttccgttttcgcttatagagctcgttcatgcc-3'                     |
| YPet-RRRRR     | YPet-RRRRR-R   | 5'-ttcatatgttaccttctctcgccttctatagagctcgttcatgcc-3'                       |
| YPet-RKARKR    | YPet-RKARKR-R  | 5'-ttcatatgttatctctccgagcttttcgcttatagagctcgttcatgcc-3'                   |
| YPet-RKARKAR   | YPet-RKARKAR-R | 5'-ttcatatgttatctagccttccgagcttttcgcttatagagctcgttcatgcc-3'               |
| YPet           | YPet-R         | 5'-ttcatatgttacttatagagctcgttcatgcc-3'                                    |
| 5R-OCT4        | 5R-OCT4-F      | 5'-ggggacaagttgtacaaaaaagcaggctctatgagaaggaggaggagaatggctggacacctggc-3'   |
|                | 5R-OCT4-R      | 5'-ggggccttgtacaagaaagctgggtcgttgaatgcatgggagagcc-3'                      |
| 5R-BRACHYURY   | 5R-BRA-F       | 5'-ggggacaagttgtacaaaaaagcaggctctatgagaaggaggaggagaatgagctcggggcacagag-3' |
|                | 5R-BRA-R       | 5'-ggggaccactttgtacaagaaagctgggtccatggatgggggtgacaca-3'                   |
| 5R-NANOG       | 5R-NANOG-F     | 5'-ggggacaagttgtacaaaaaagcaggctctatgagaaggaggaggagaatgagtgtgggtcttctgg-3' |
|                | 5R-NANOG-R     | 5'-ggggaccactttgtacaagaaagctgggtctatttcacctggtggagtcaca-3'                |
| 5R-PRR3        | 5R-PRR3-F      | 5'-ggggacaagttgtacaaaaaagcaggctctatgagaaggaggaggagaatggctaacgggaagcctg-3' |
|                | 5R-PRR3-R:     | 5'-ggggaccactttgtacaagaaagctgggtccagaggagggtccgttgacg-3'                  |
